# Supplementary material for: An Eight-Parent Multiparent Advanced Generation Inter-Cross Population for Winter-Sown Wheat: Creation, Properties, and Validation
Source: PubMed Central journal article supplement (PMC4169152; doi:10.1534/g3.114.012963), 2014-09-01

**Figure S1** MAGIC progeny LD heatmaps and LD decay plots for the 21 wheat chromosomes based on 13074 mapped and segregating SNPs. For each chromosome: Top left: heatmap of LD among ordered markers.  $D'$  above diagonal,  $r^2$  below. Bottom left: heatmap scaled by genetic map. Top right LD decay ( $r^2$ ) plotted against genetic distance between marker pairs. Bottom right: LD decay ( $D'$ ) plotted against genetic distance between marker pairs.

All, no map

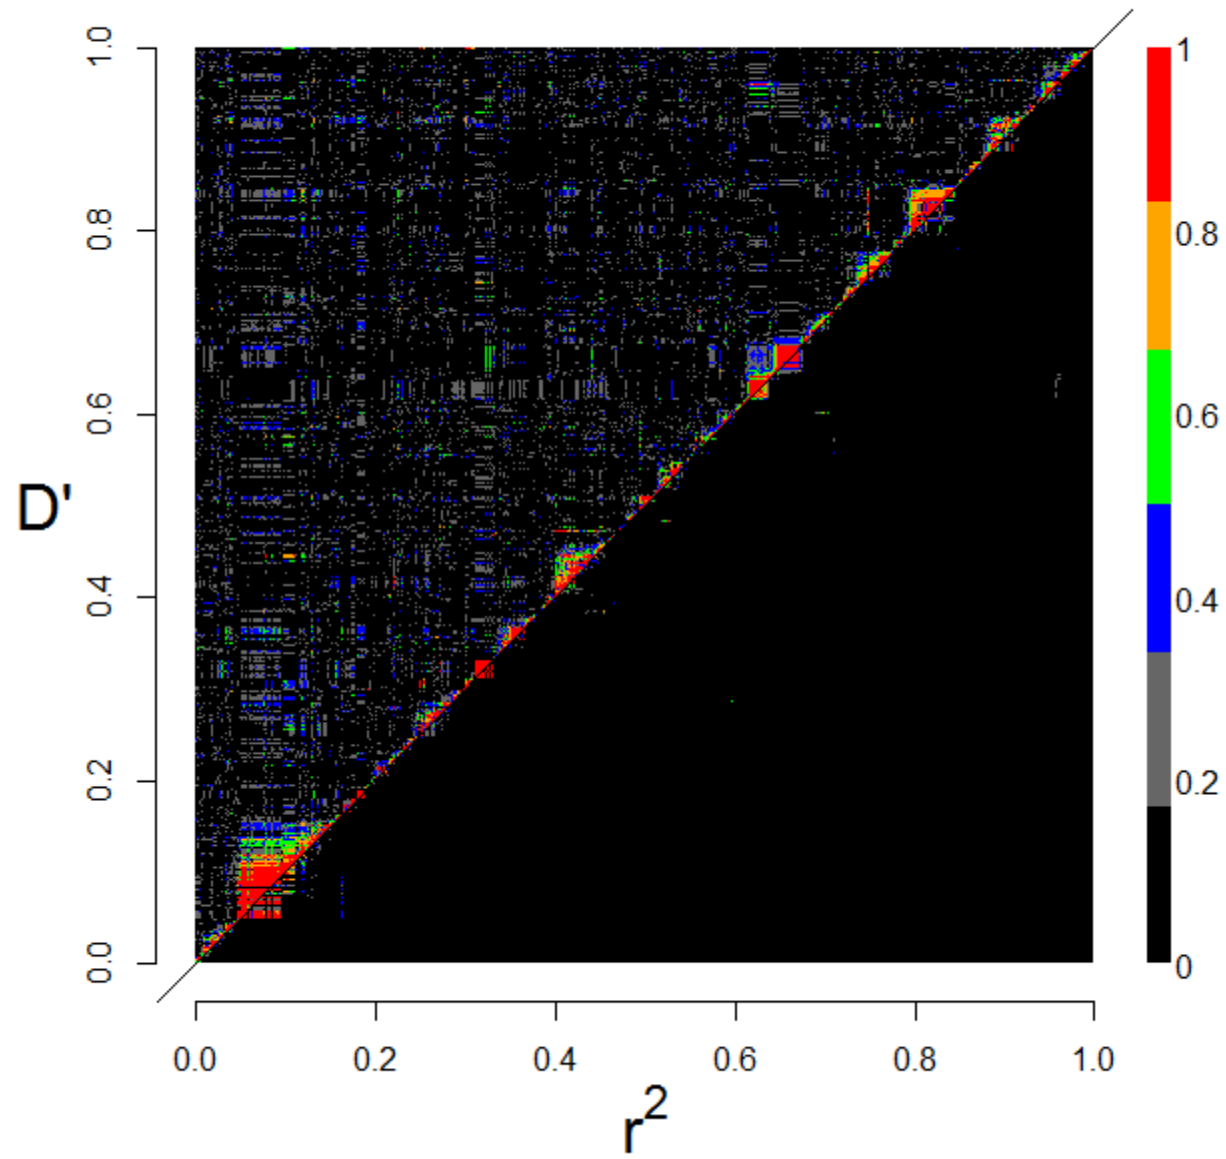

All, with map, change chromosome every 250 cM

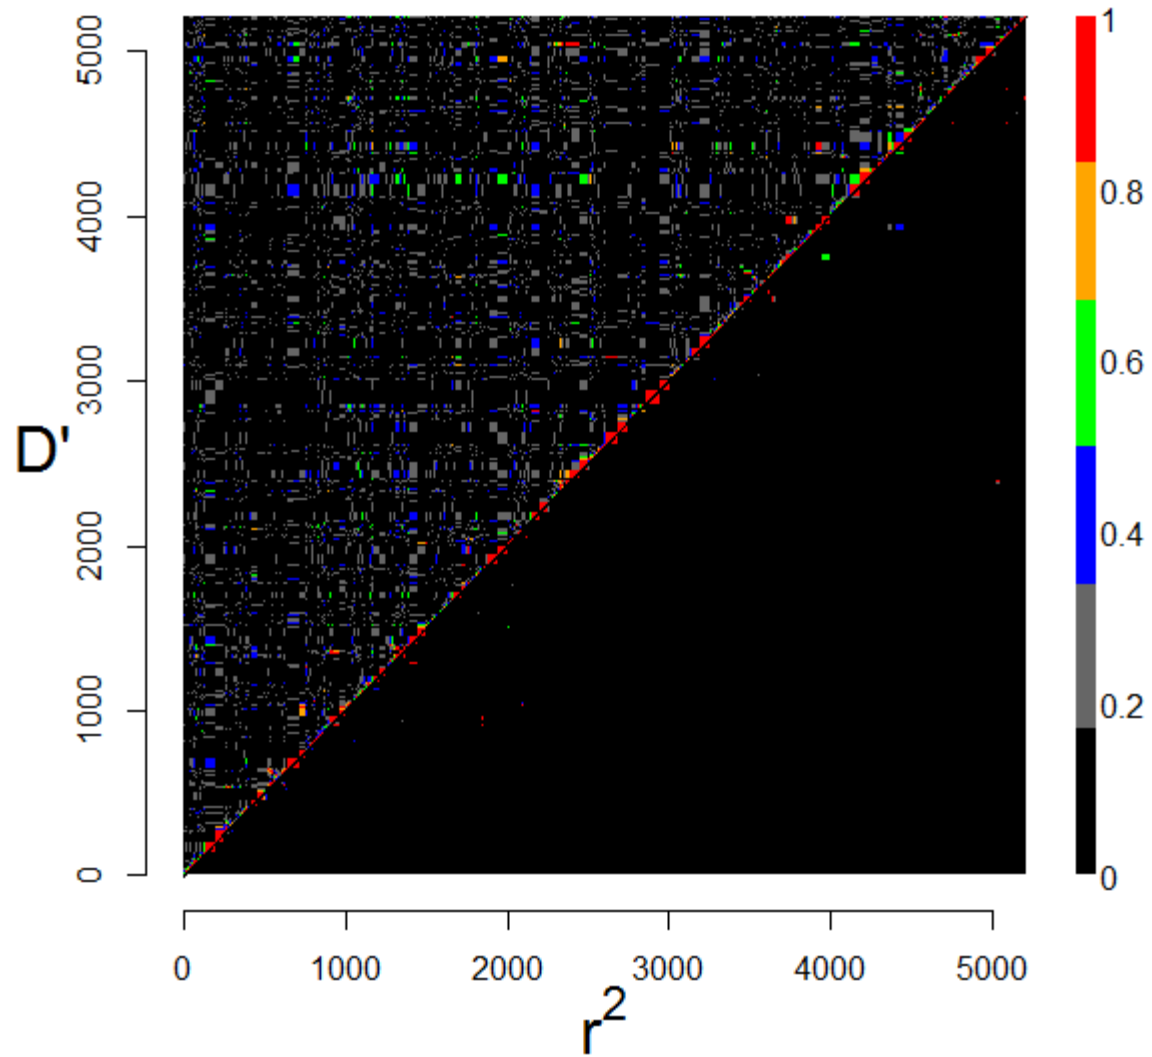

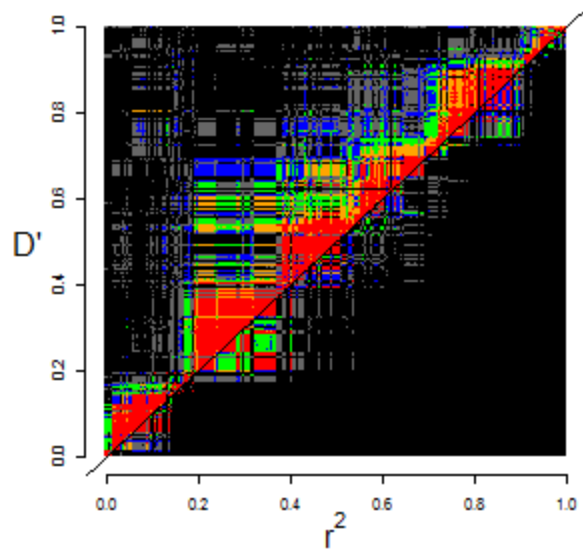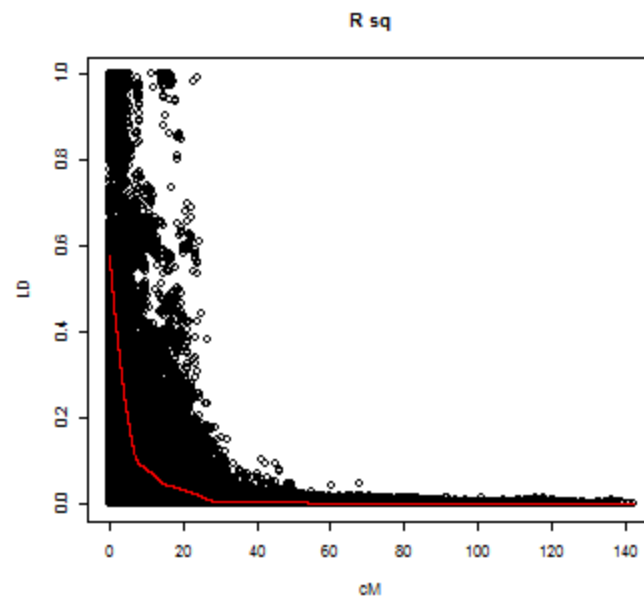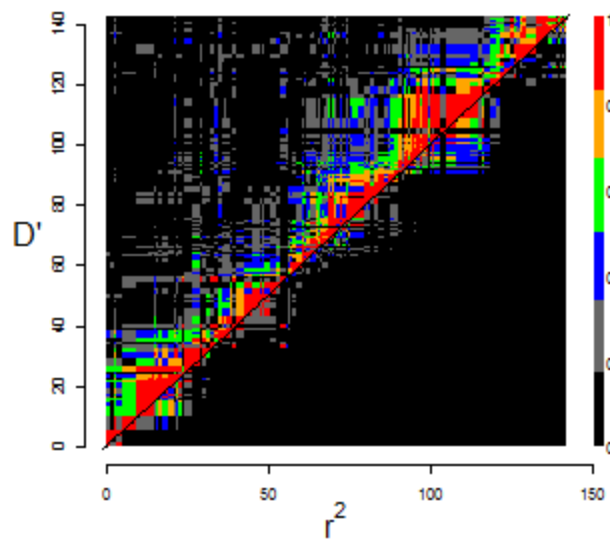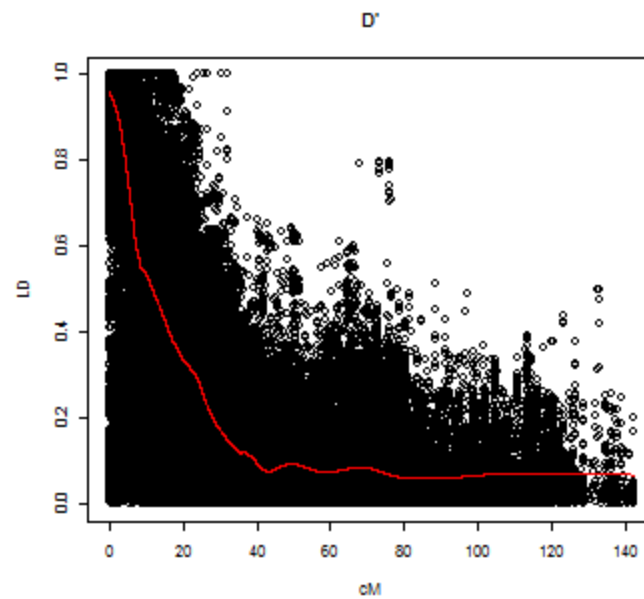

1A

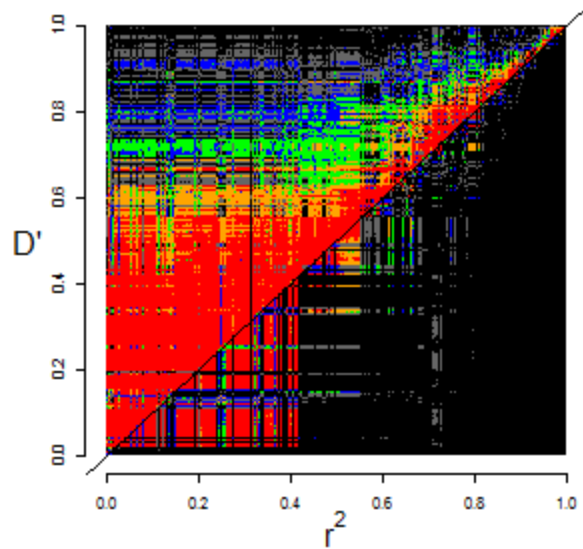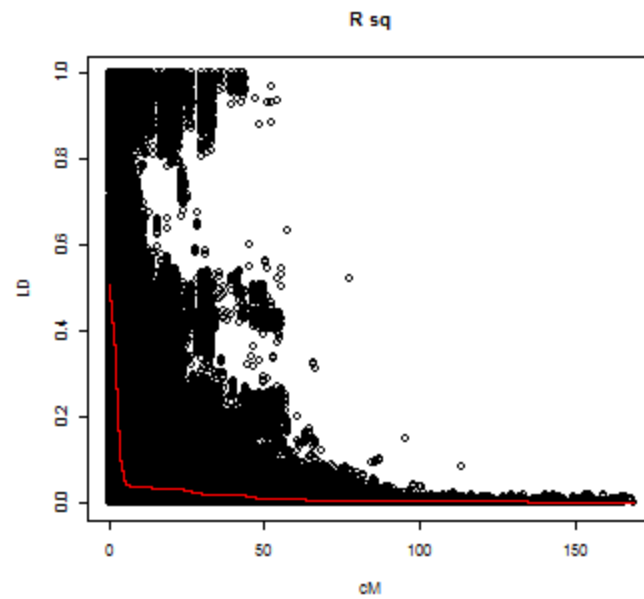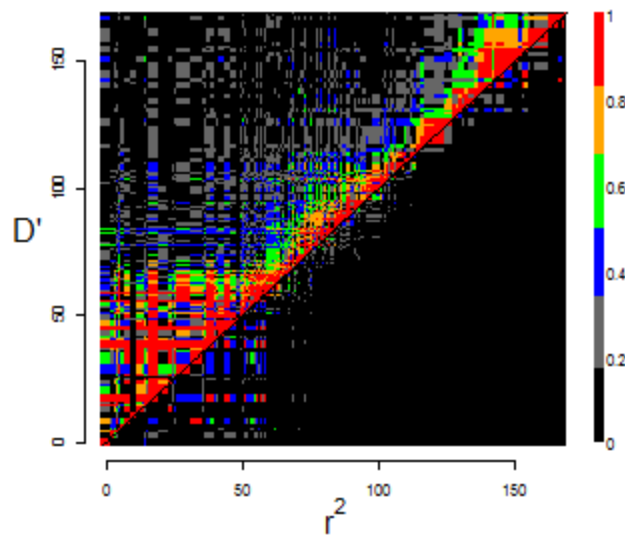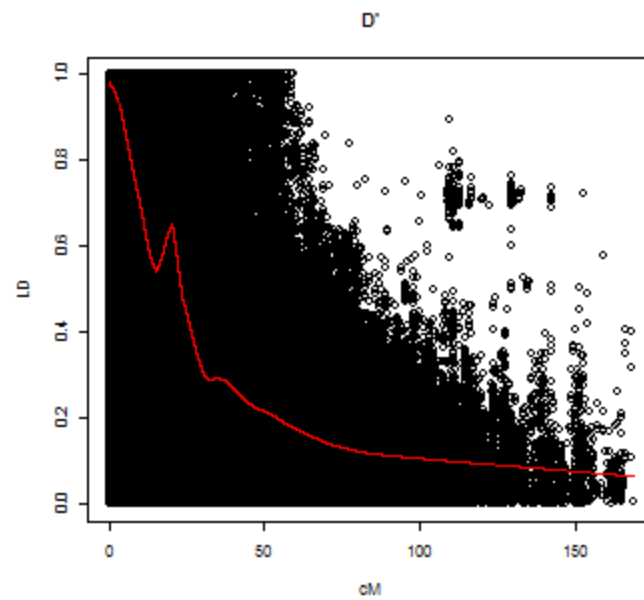

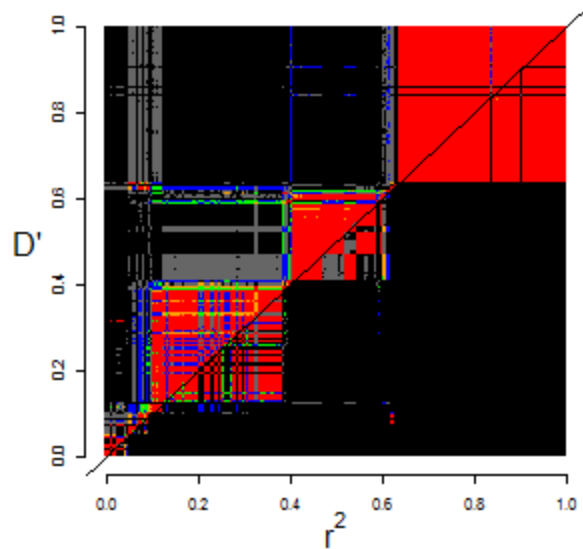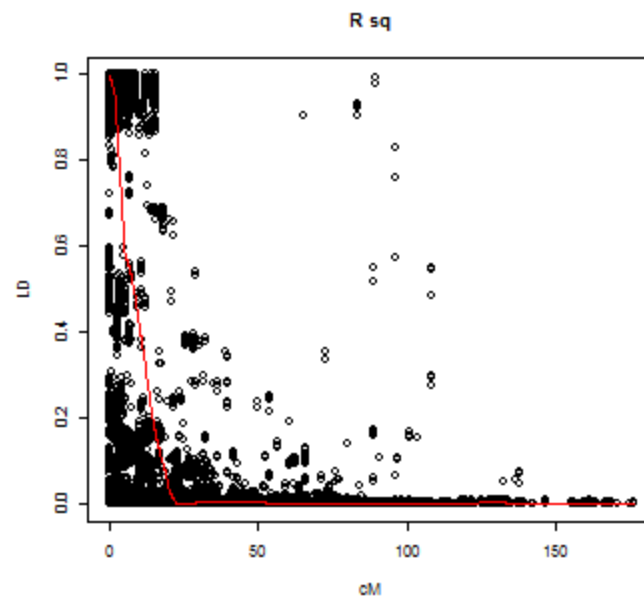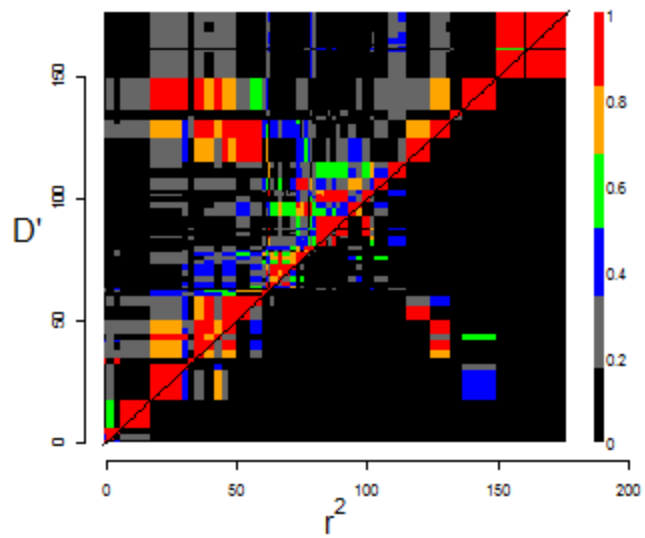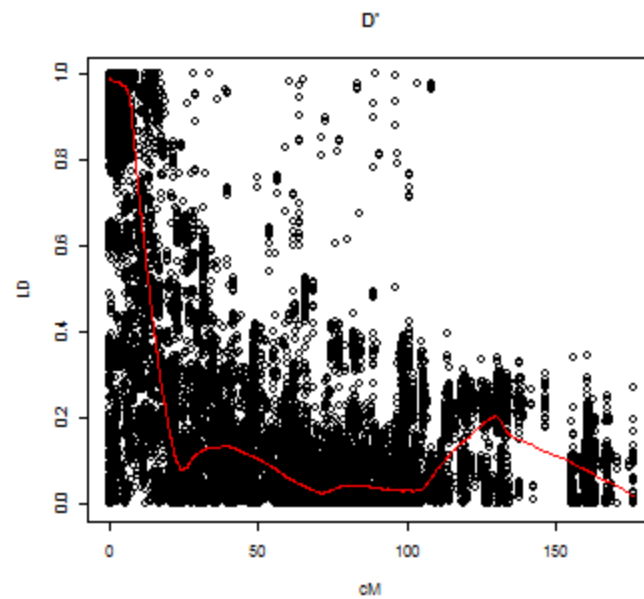

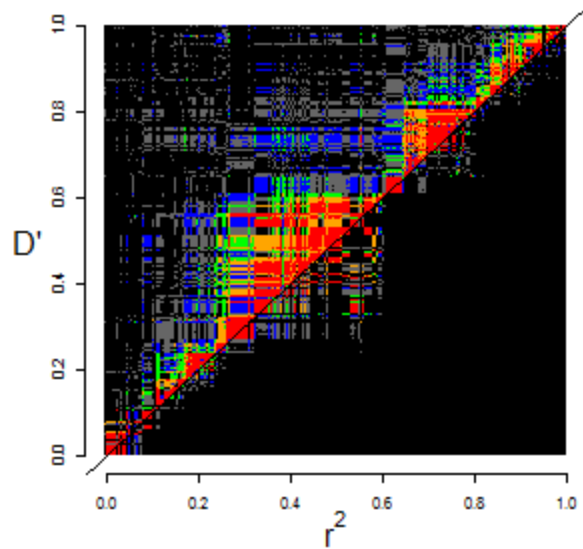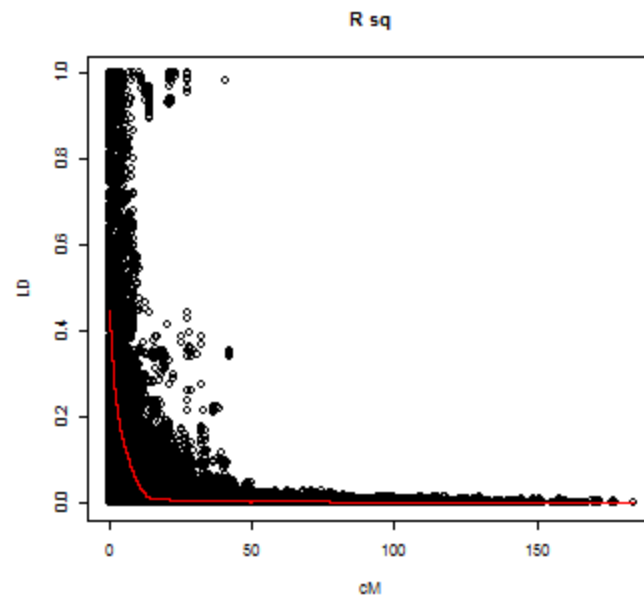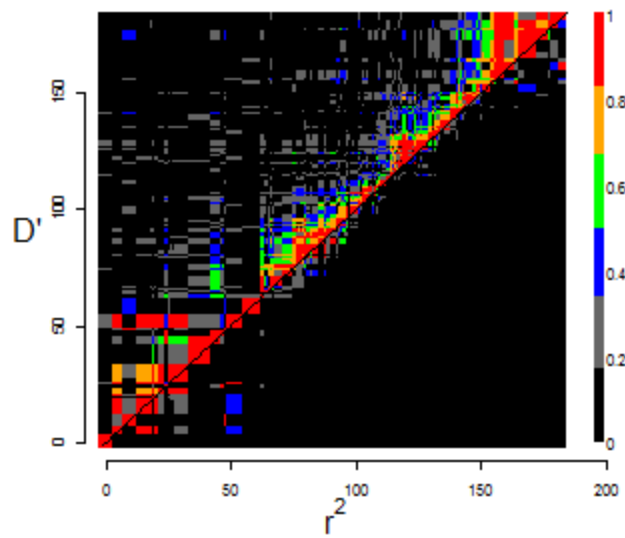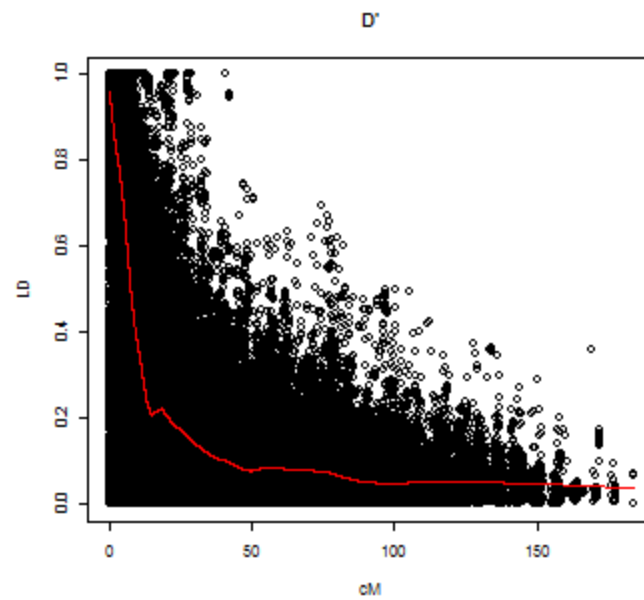

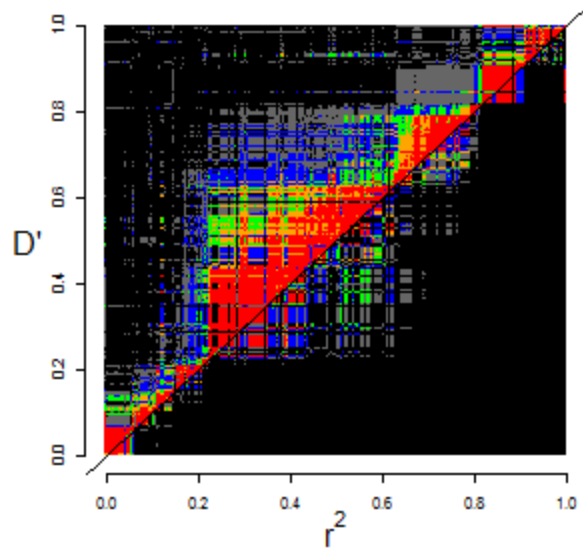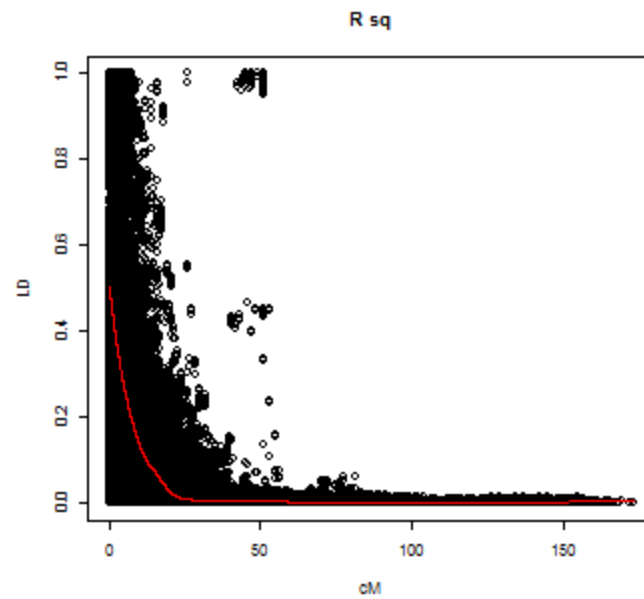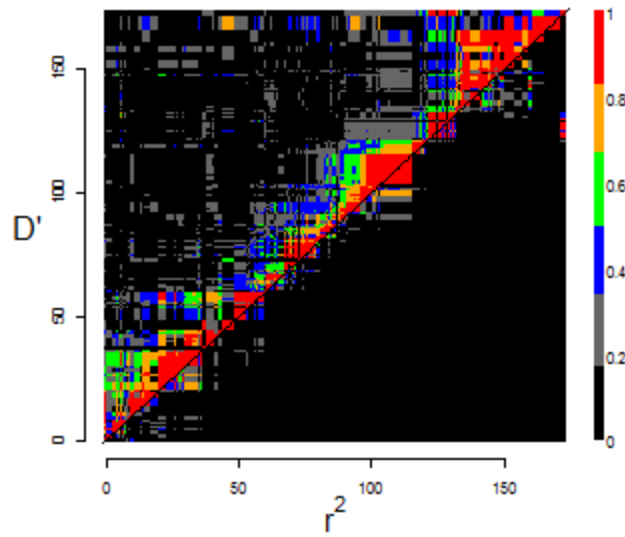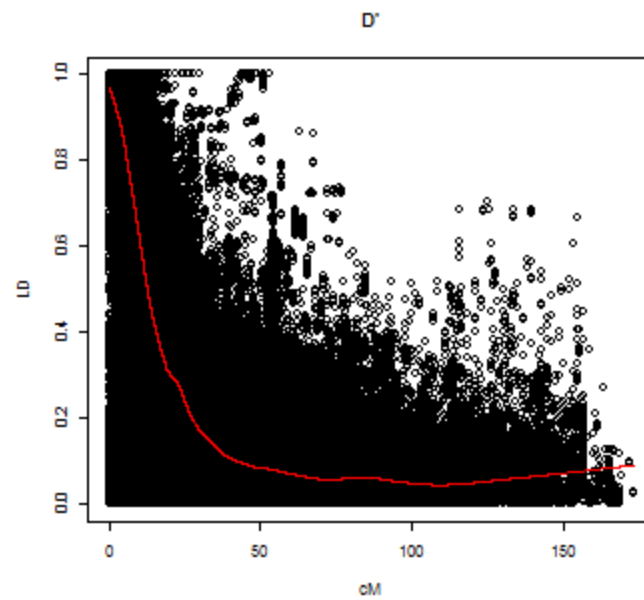



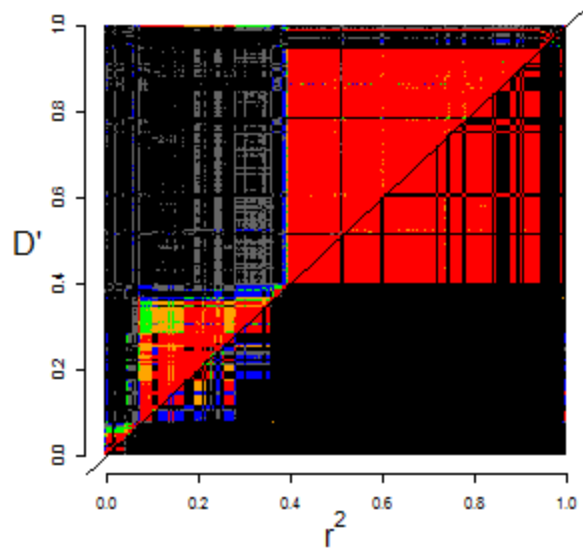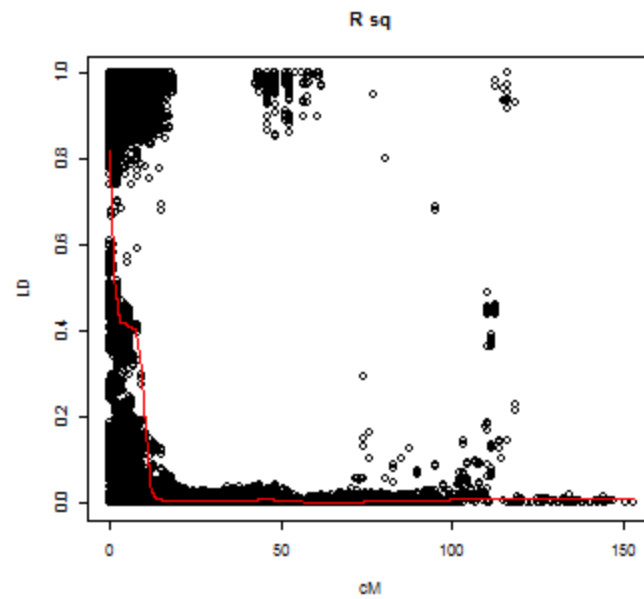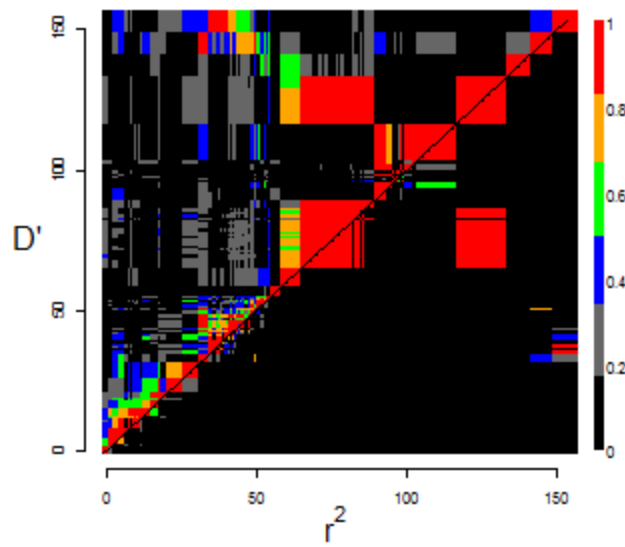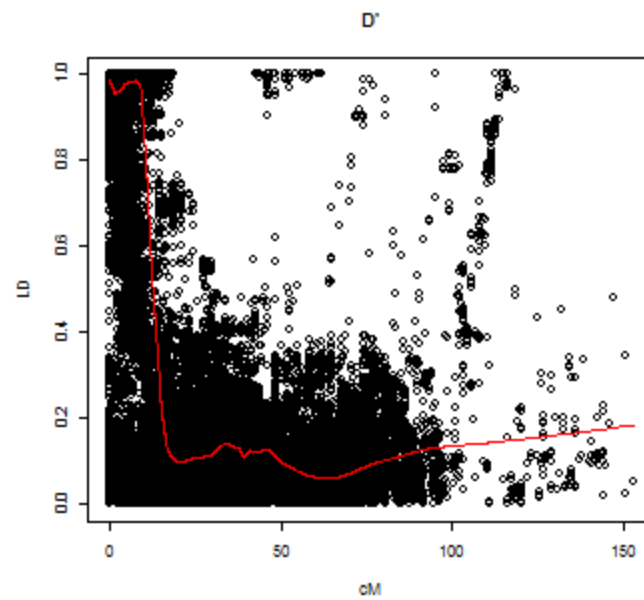

2D

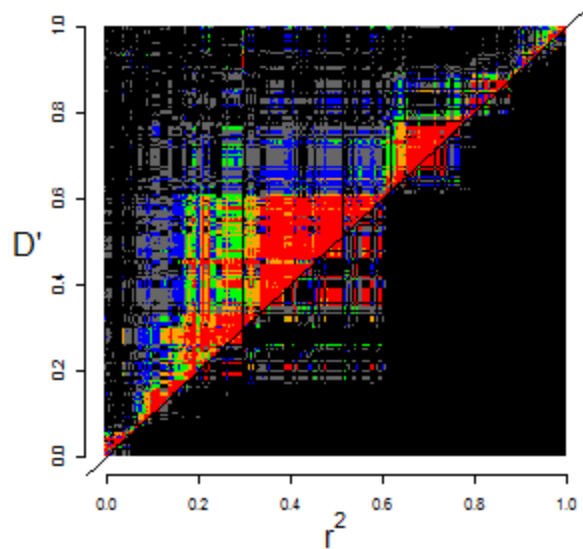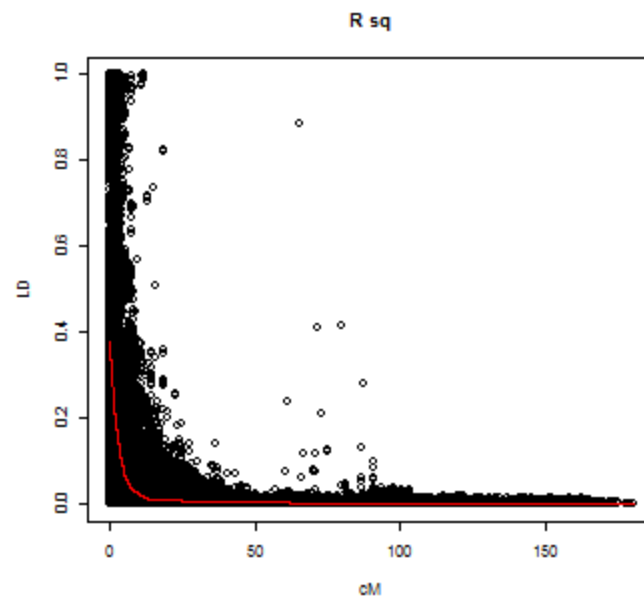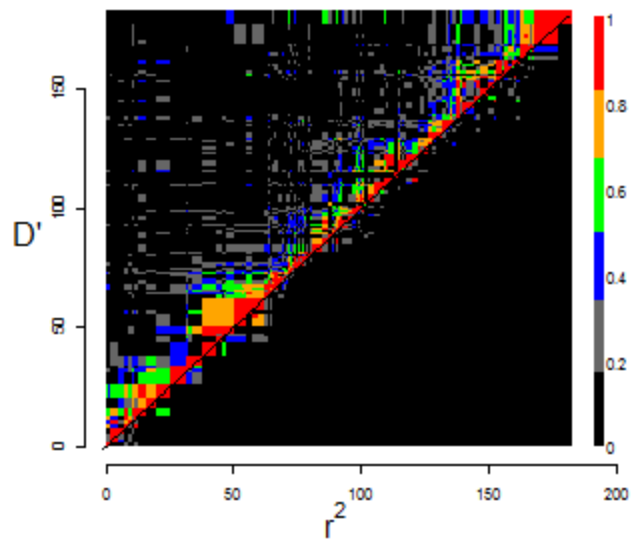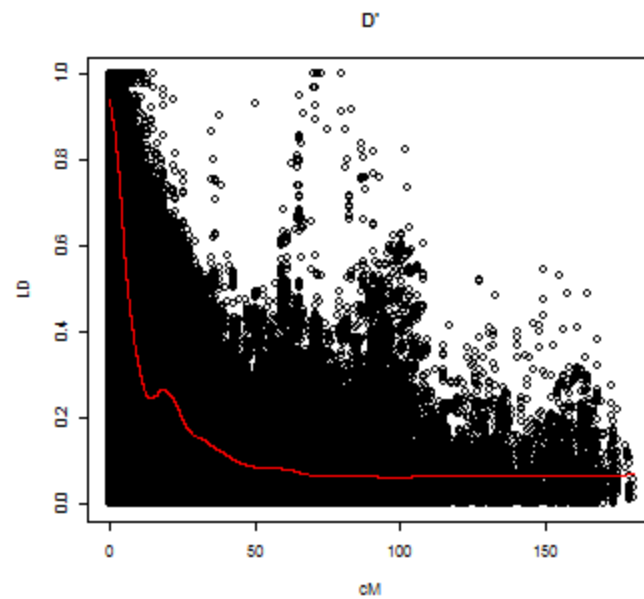

3A

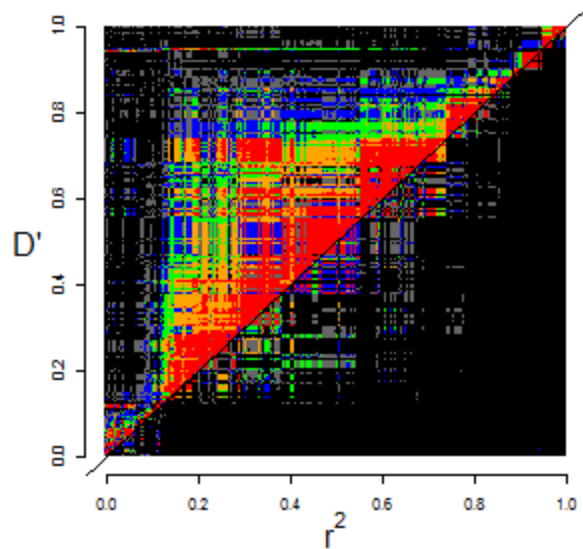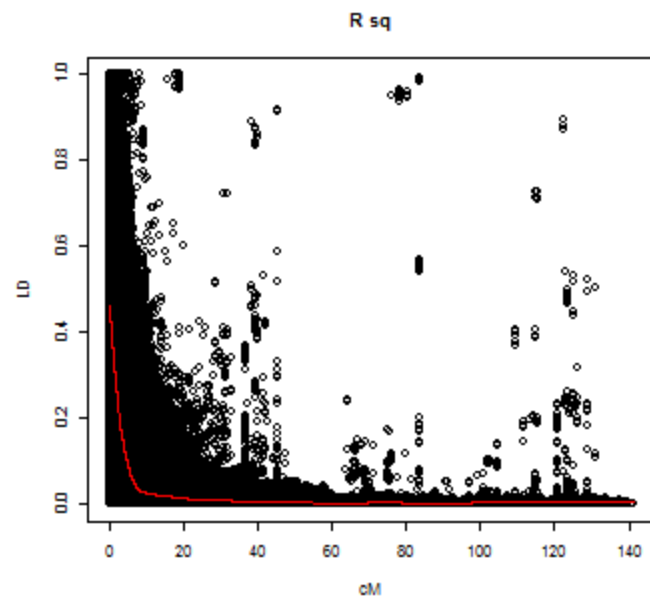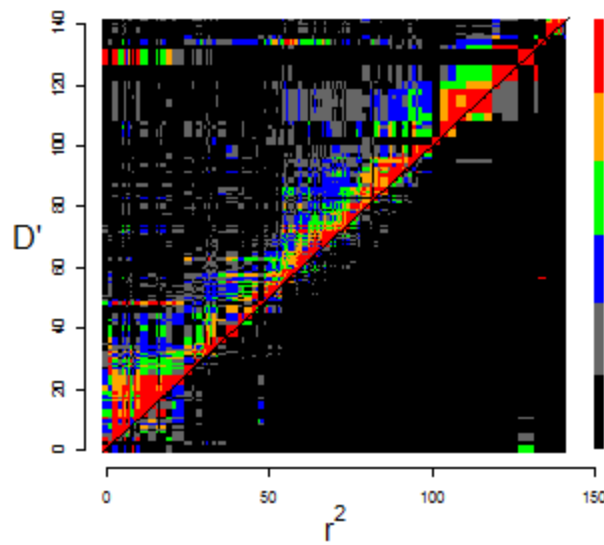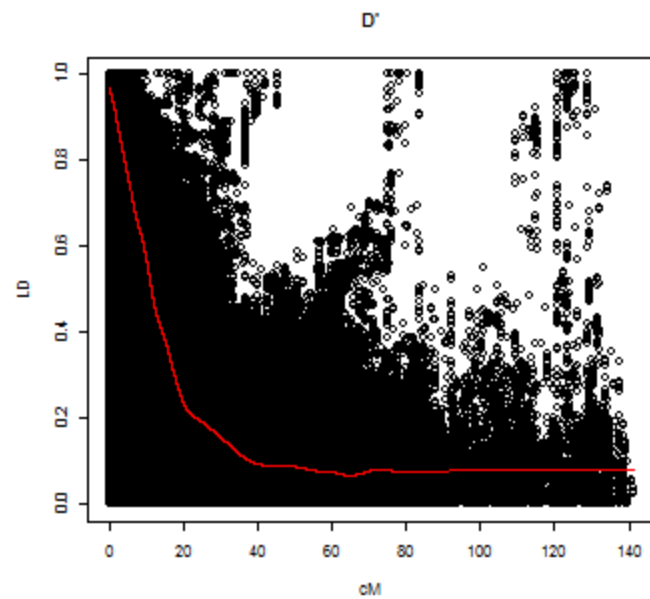

3B

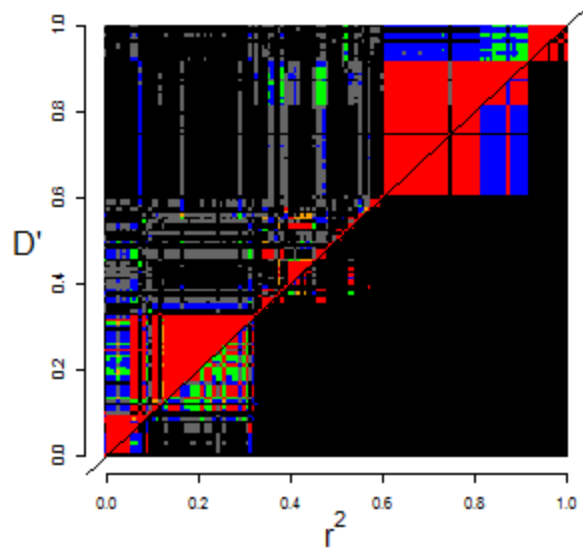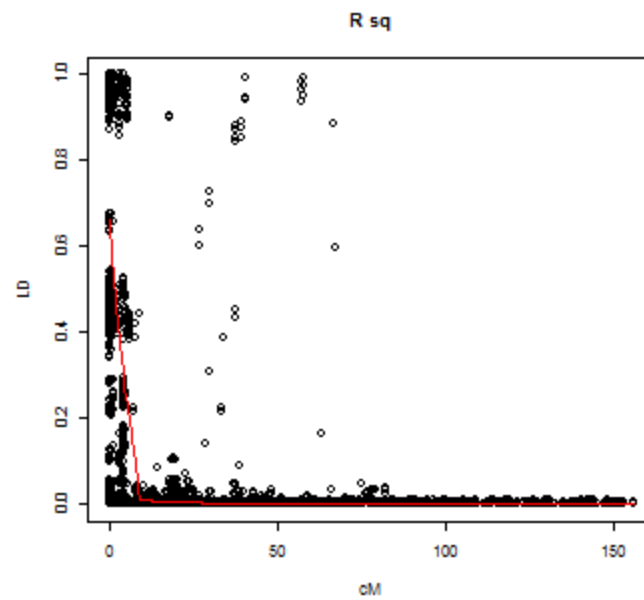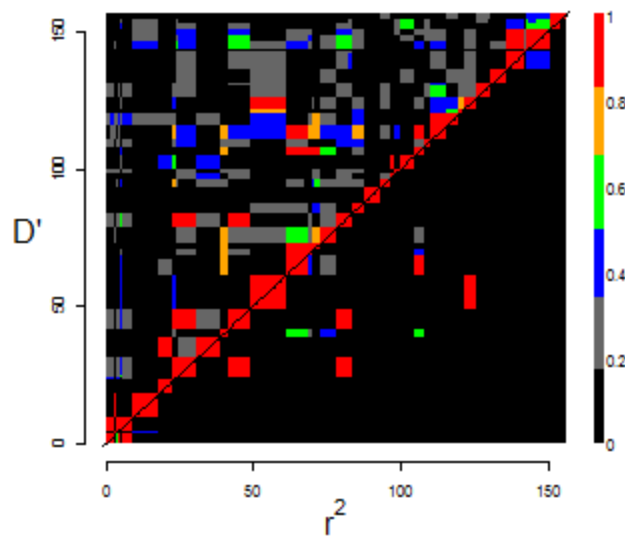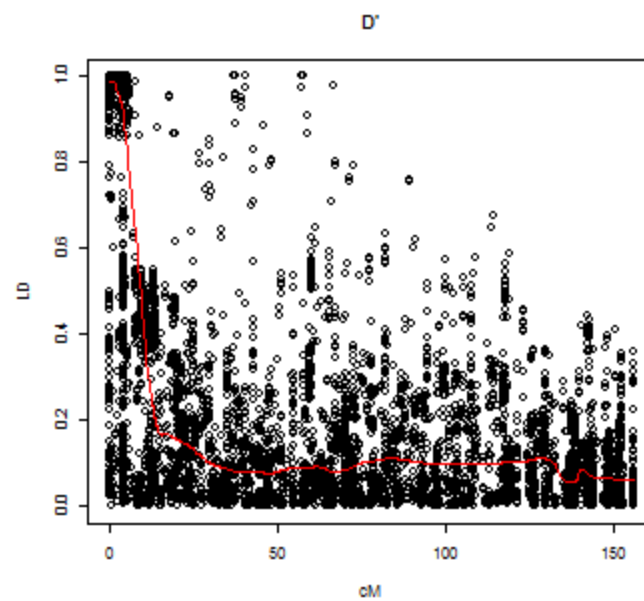

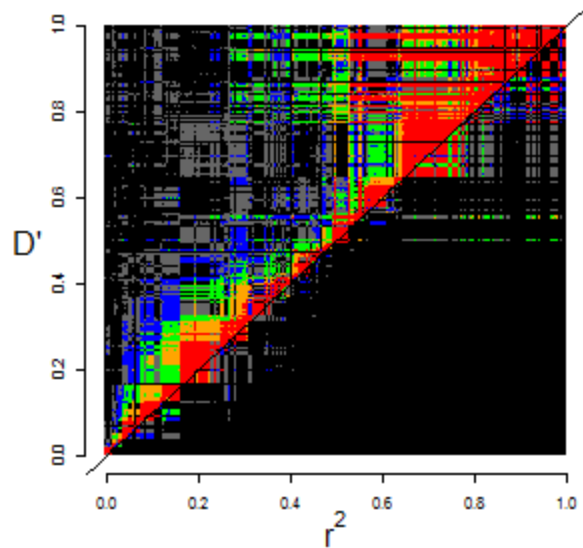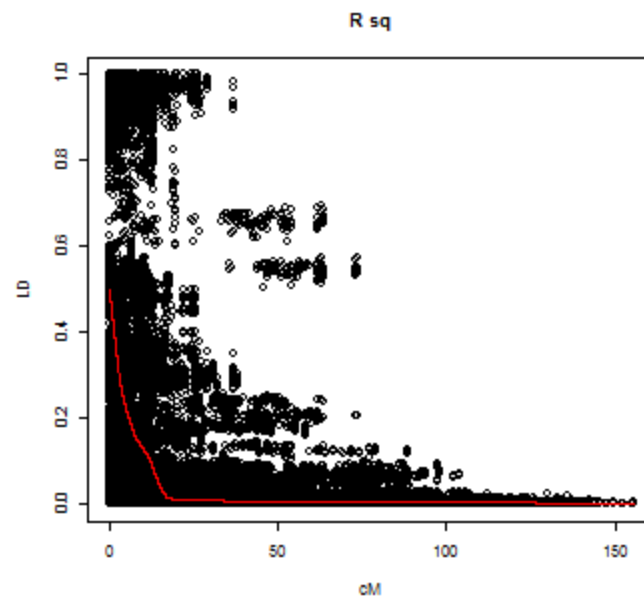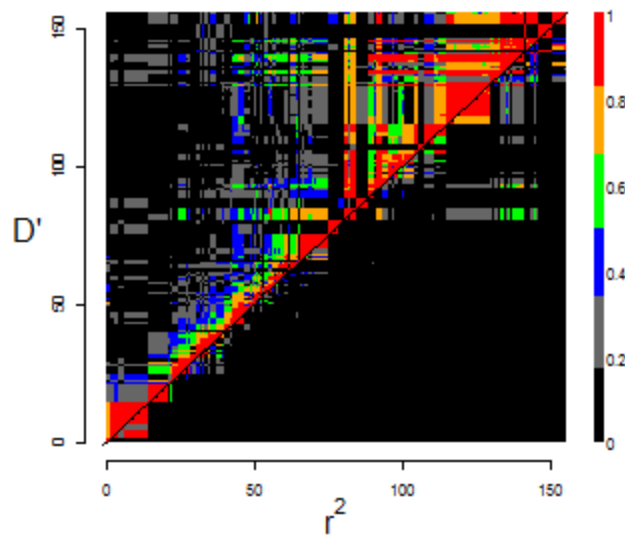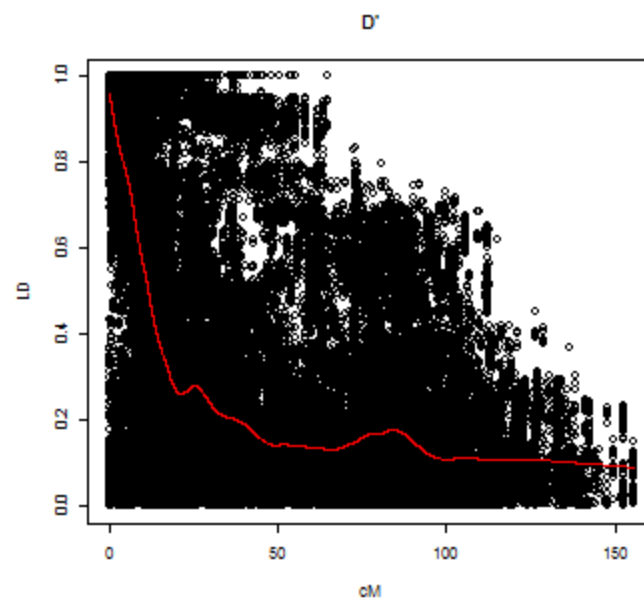

4A

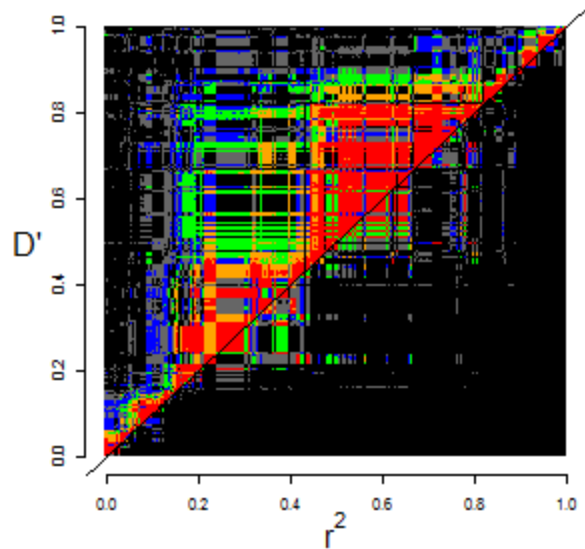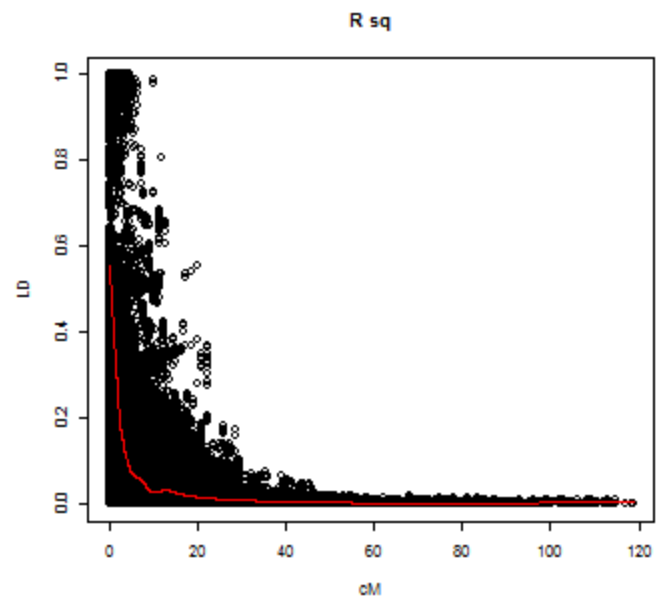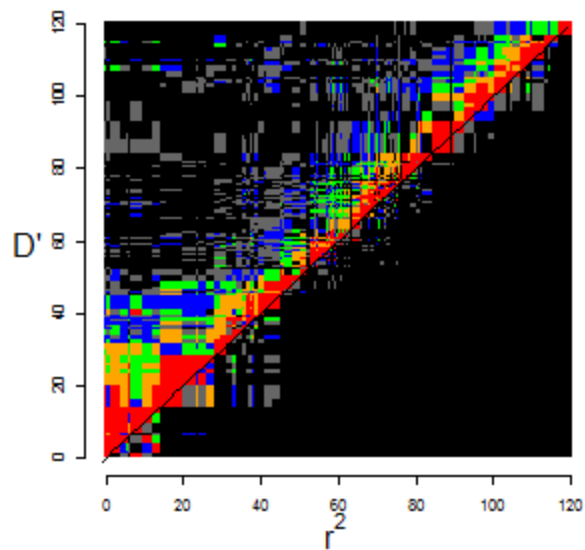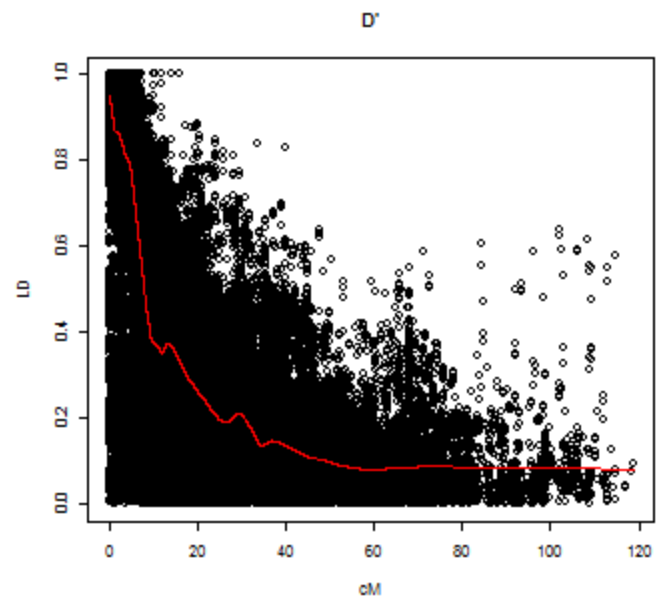

4B

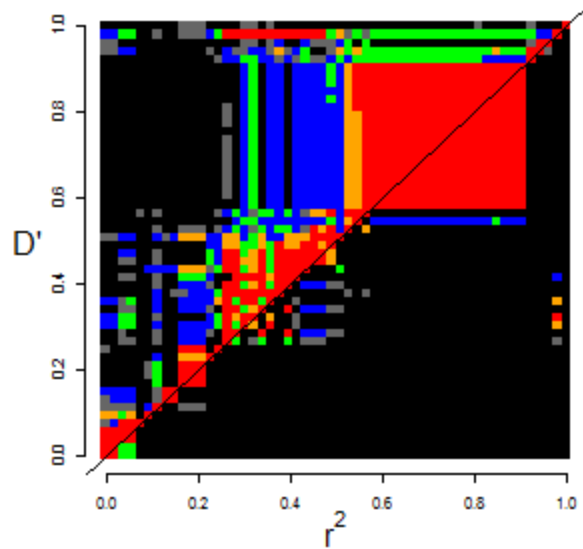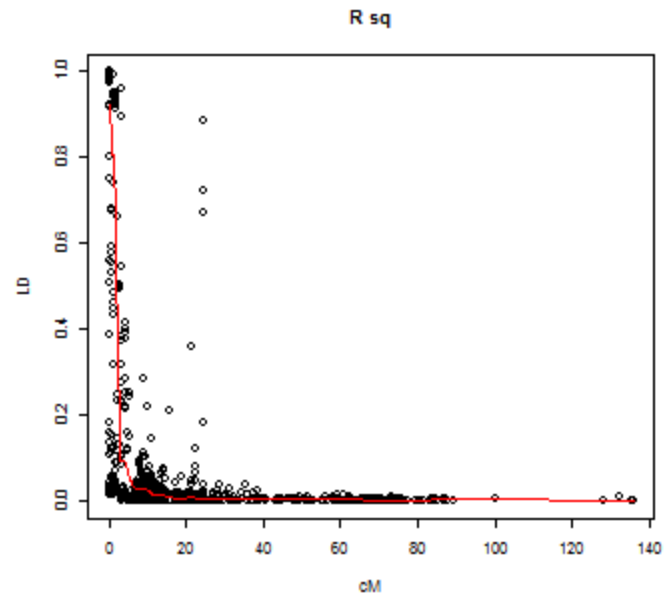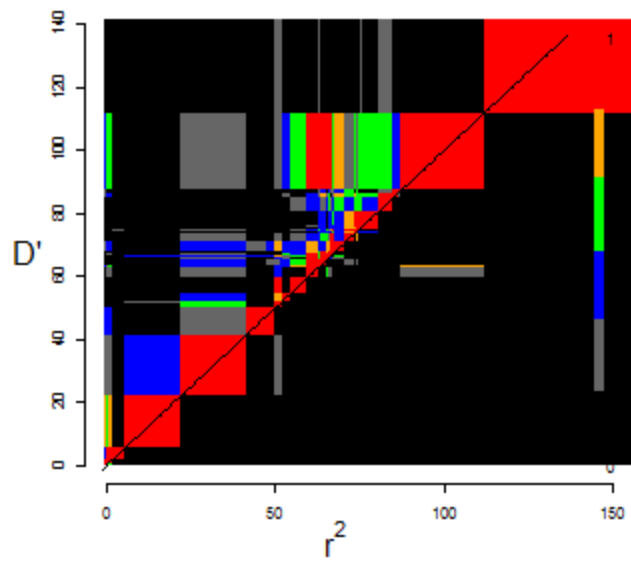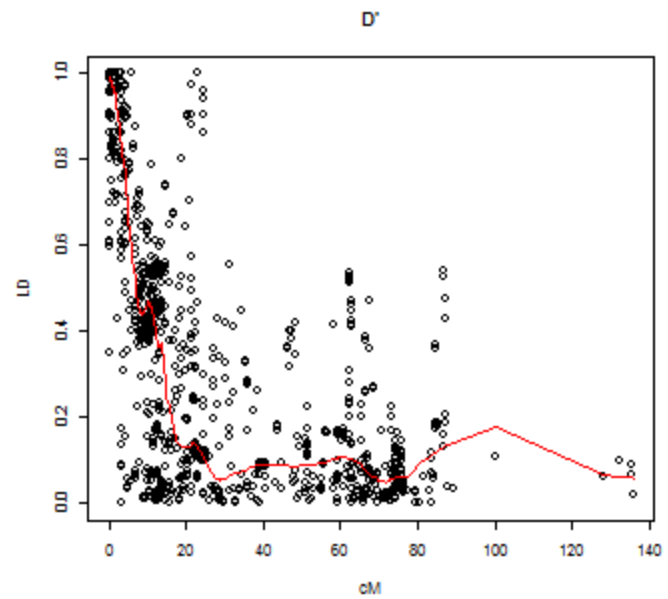

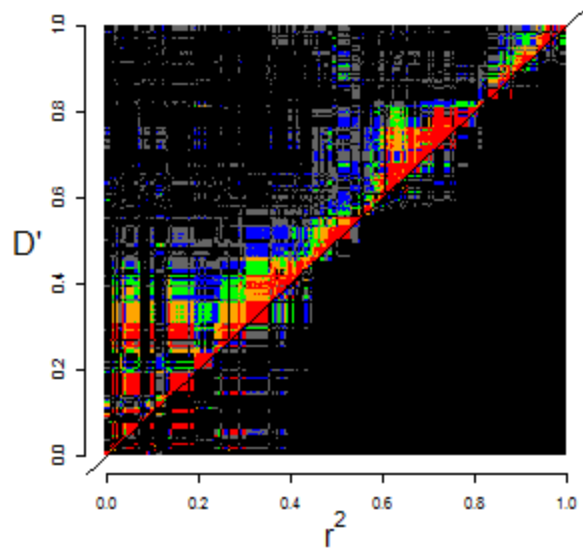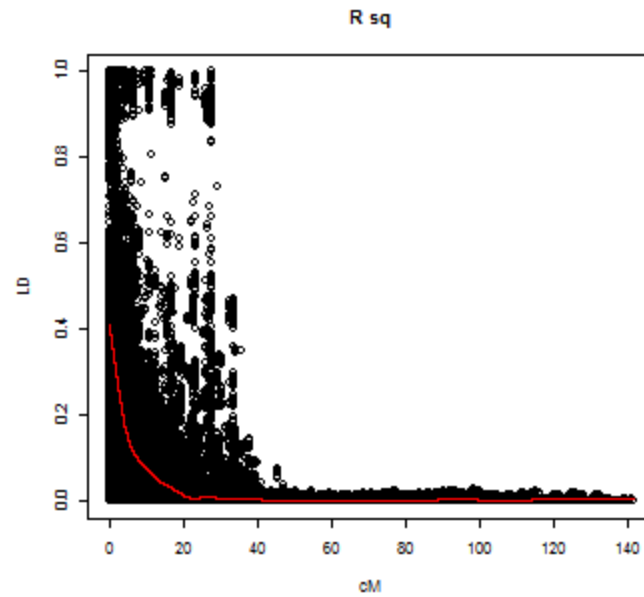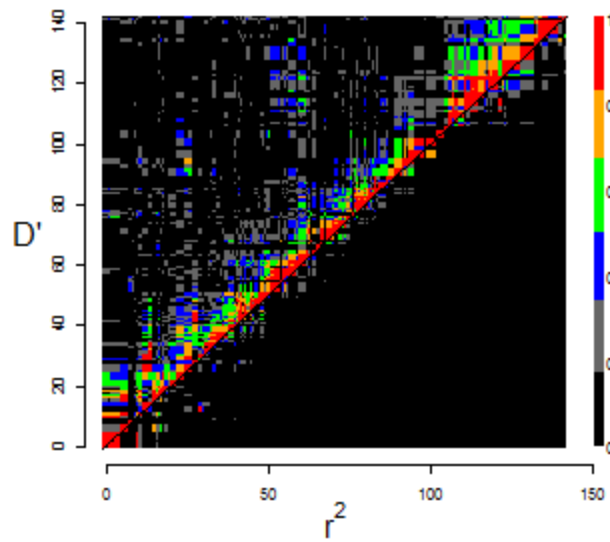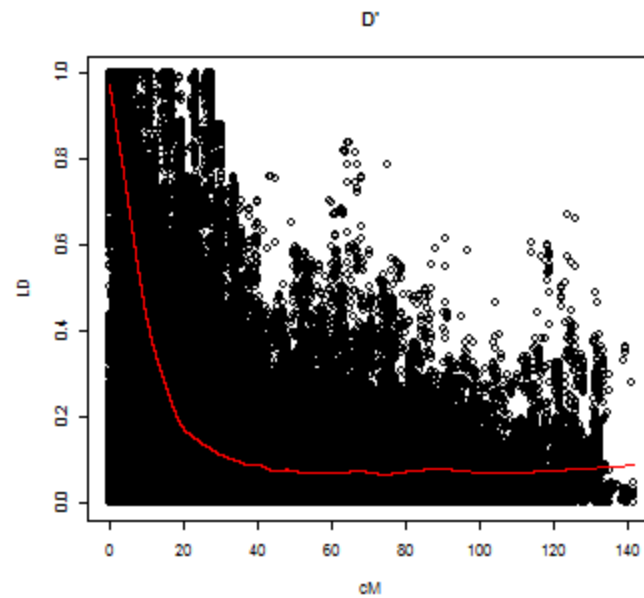

5A



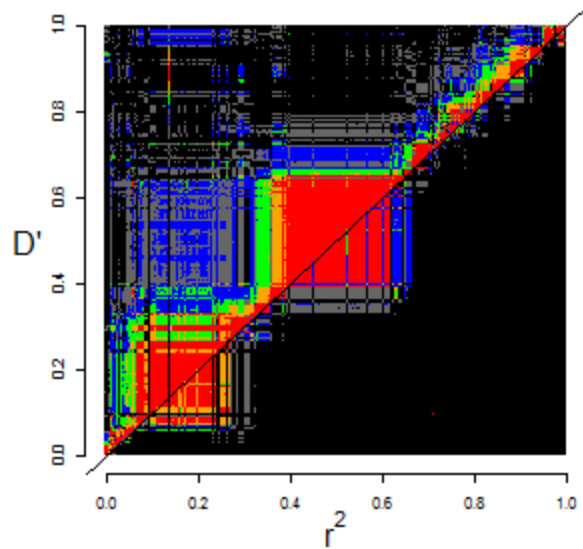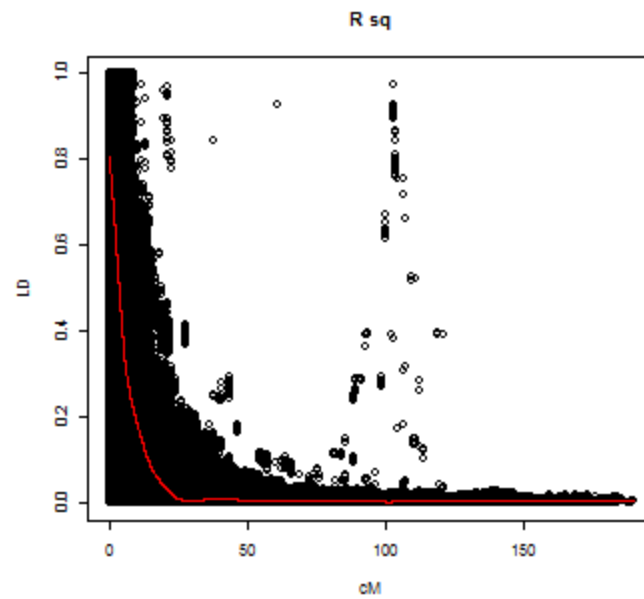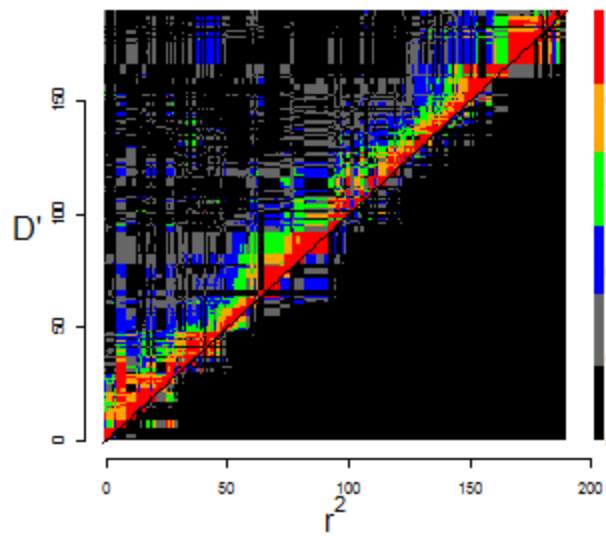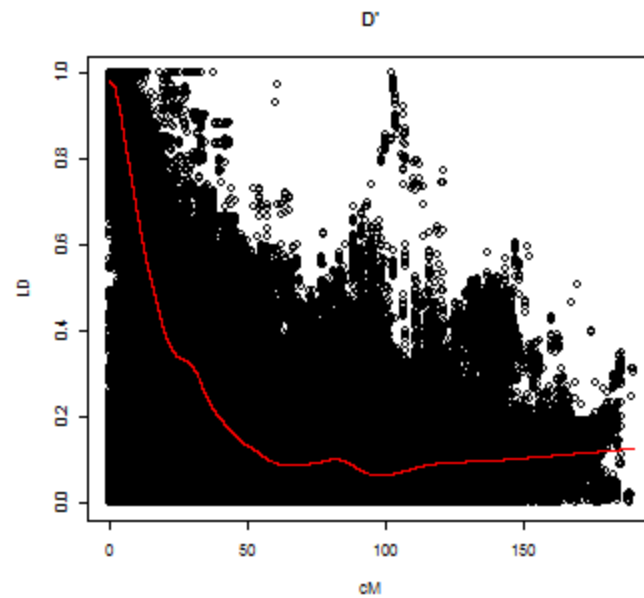

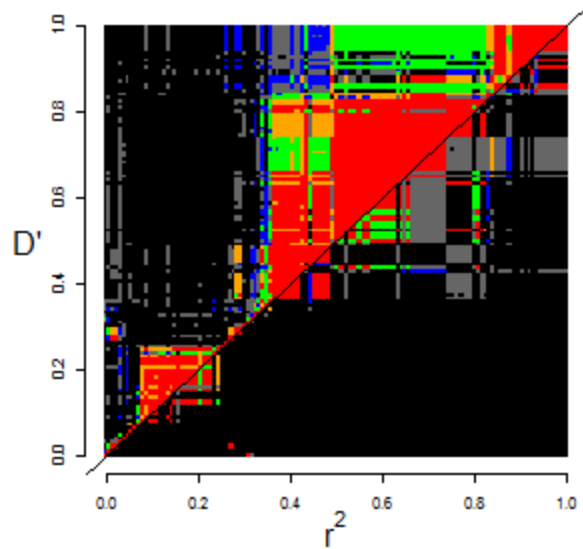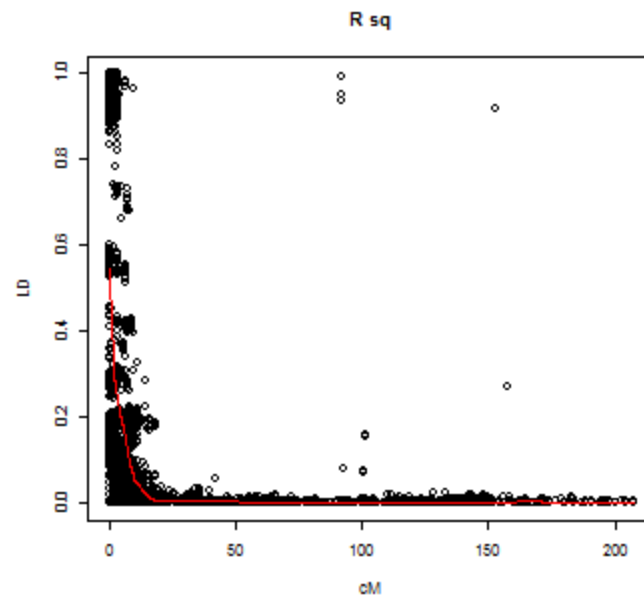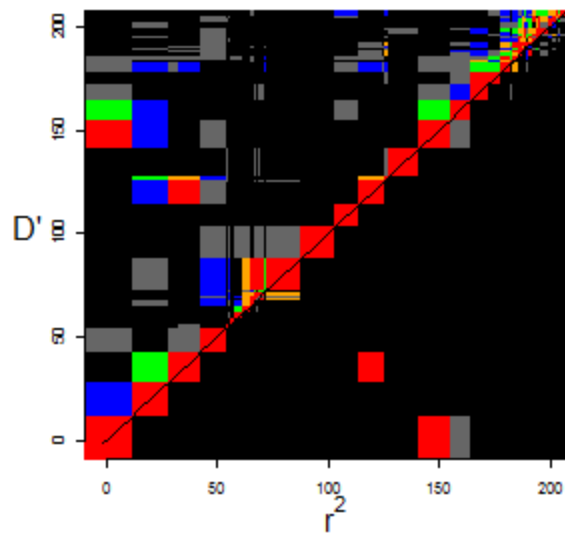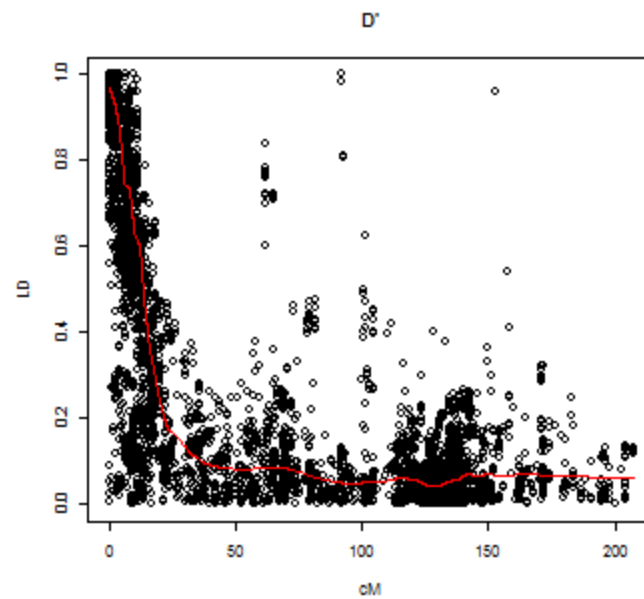

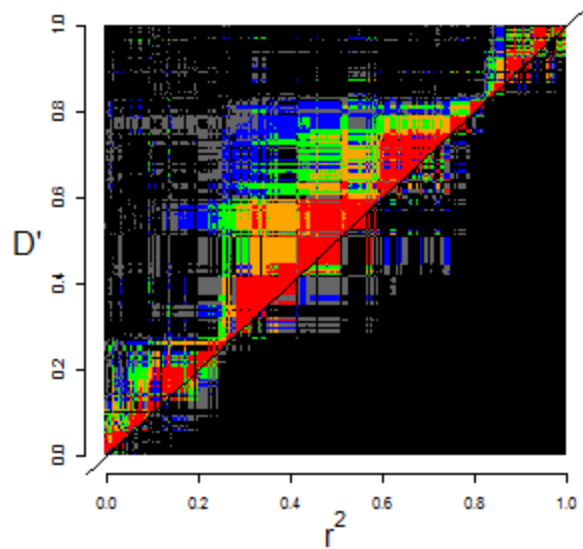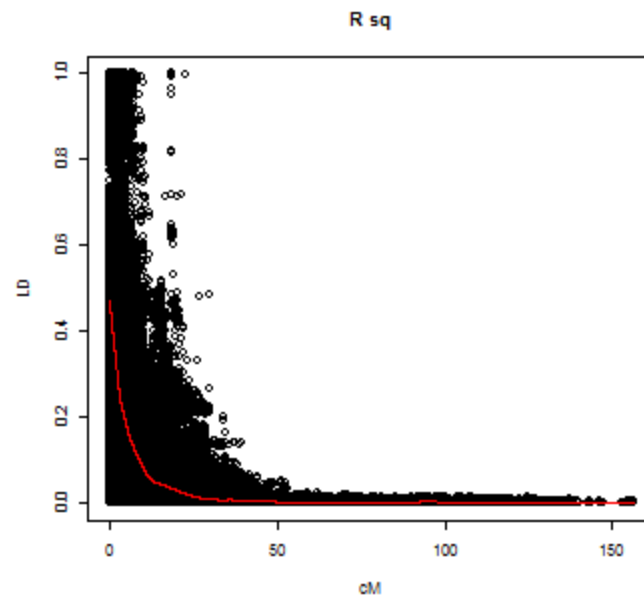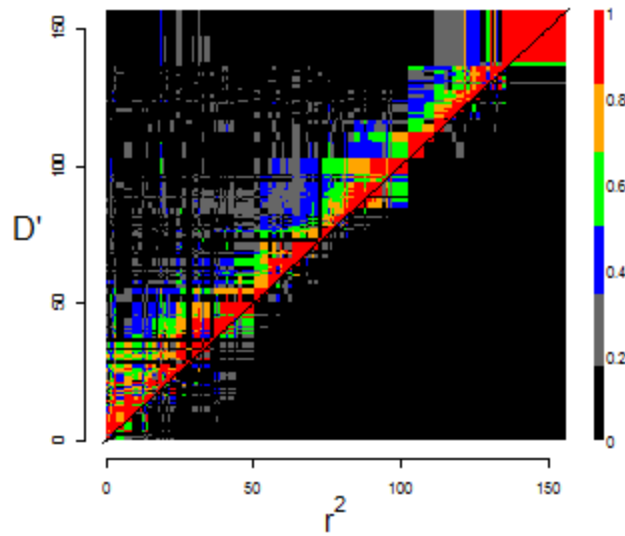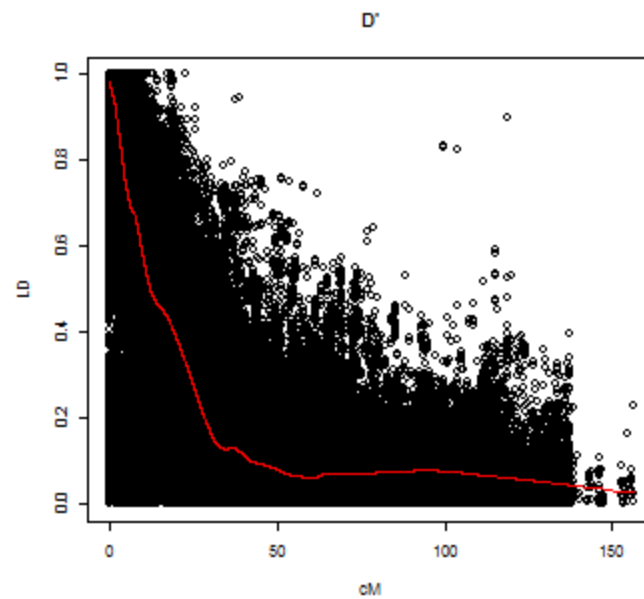

6A

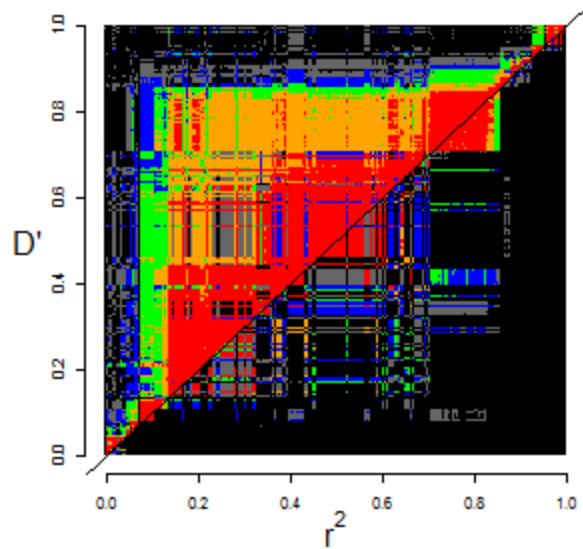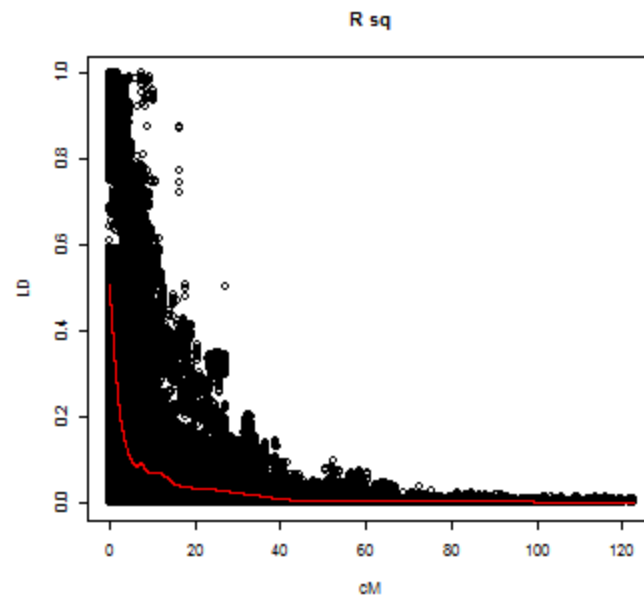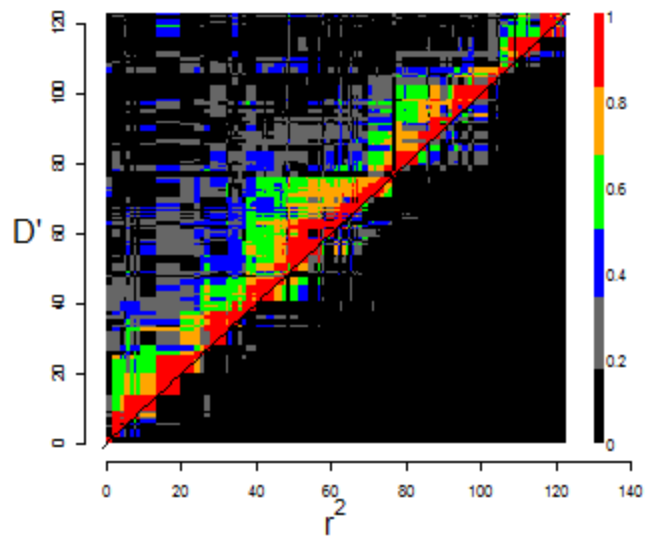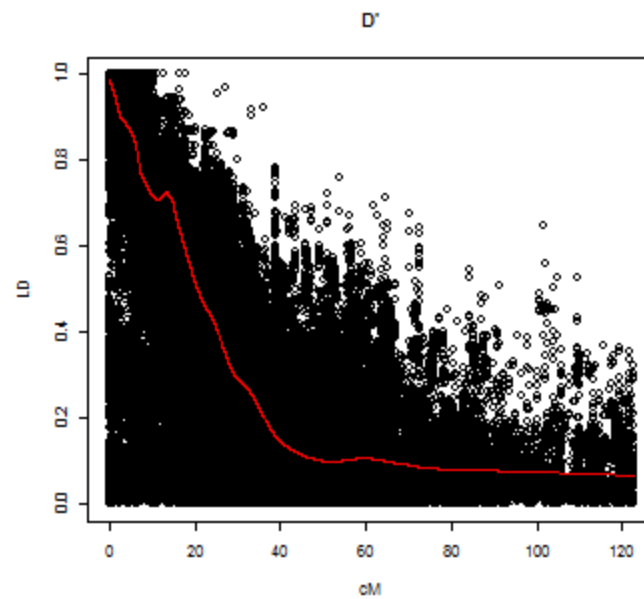

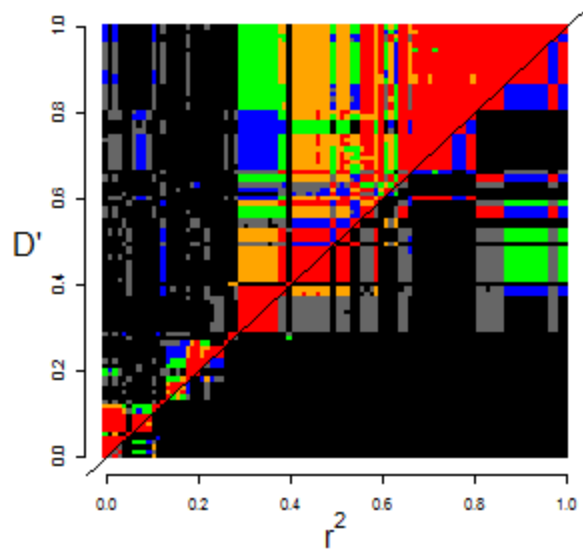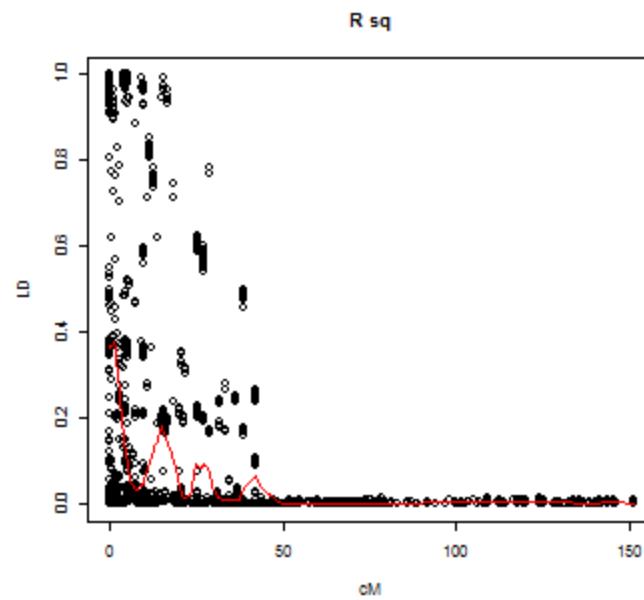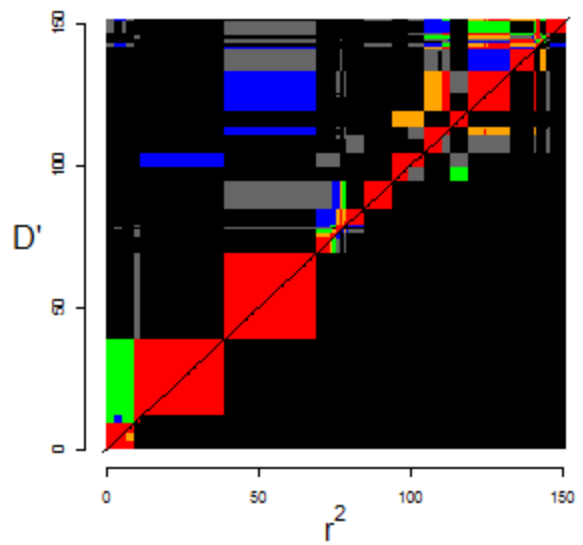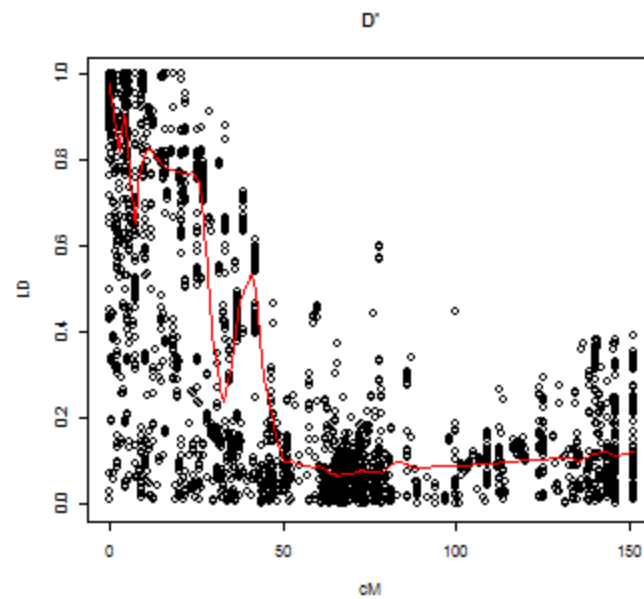

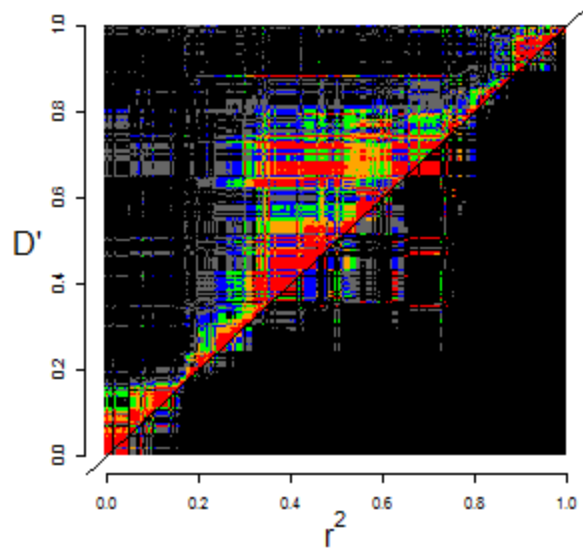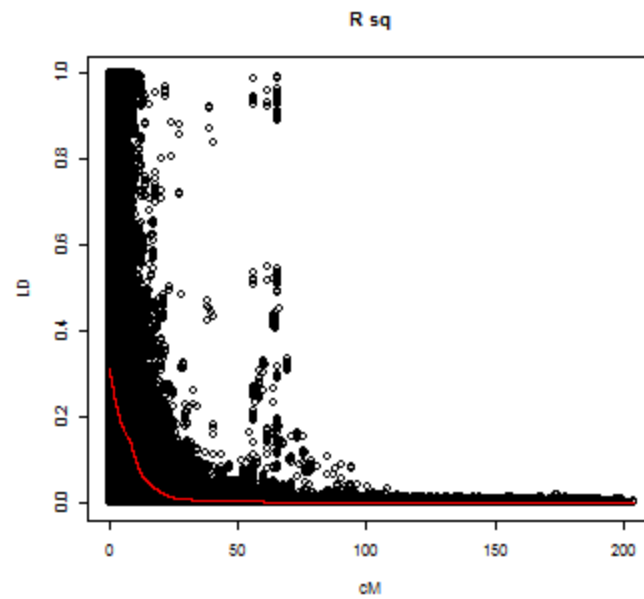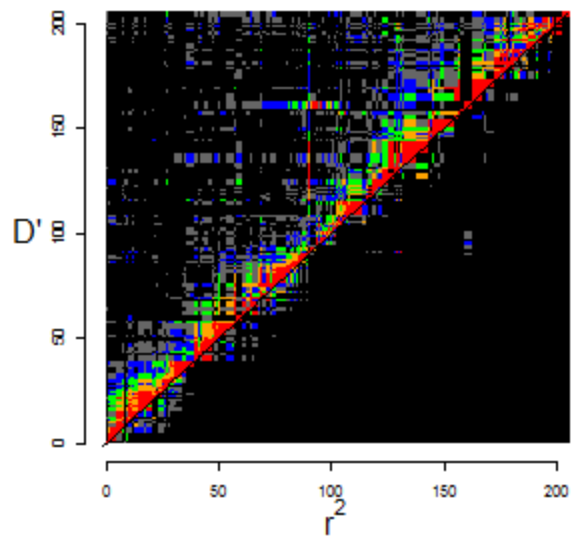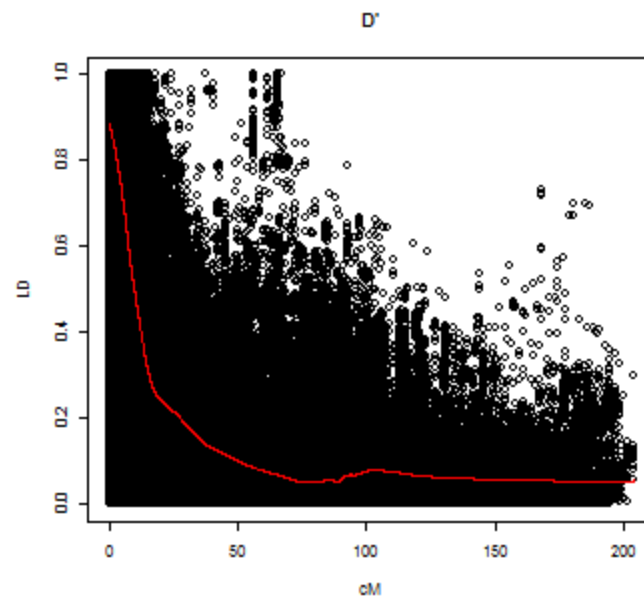

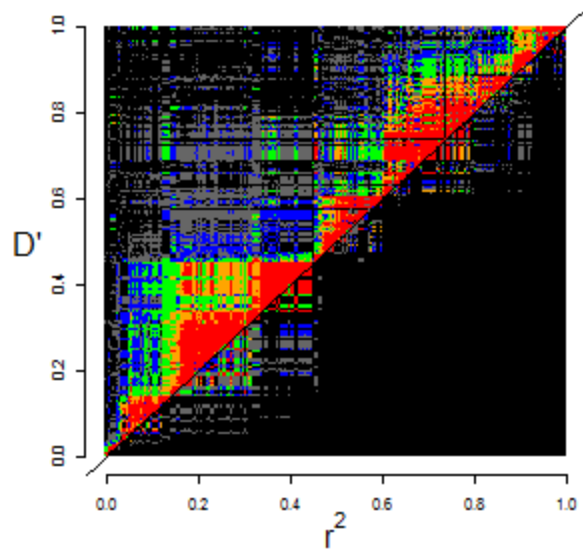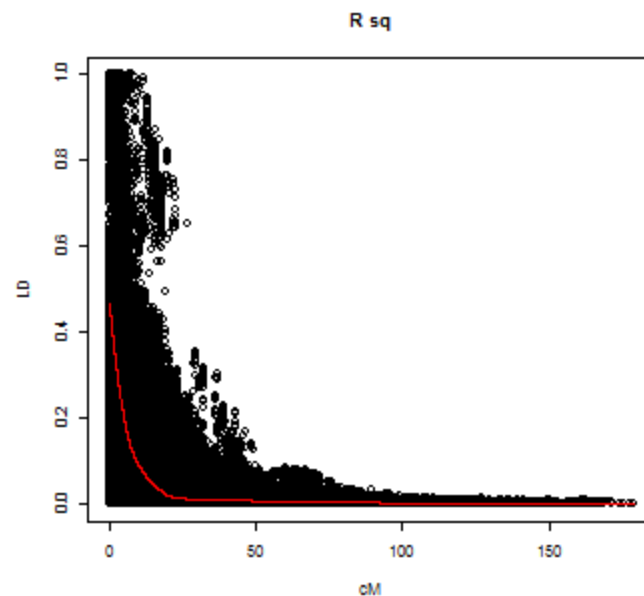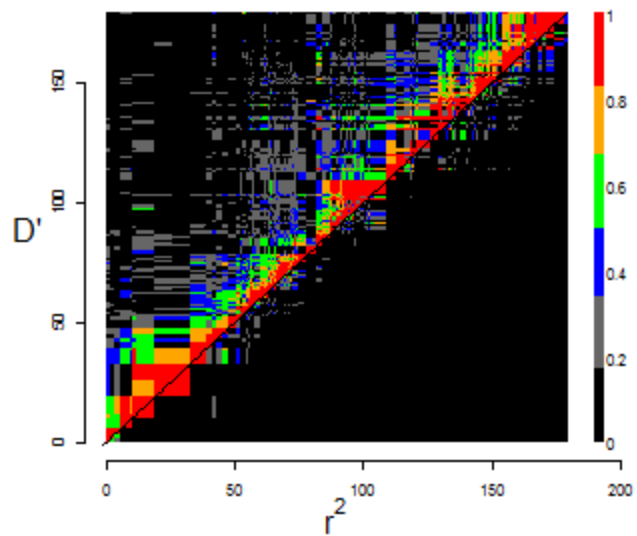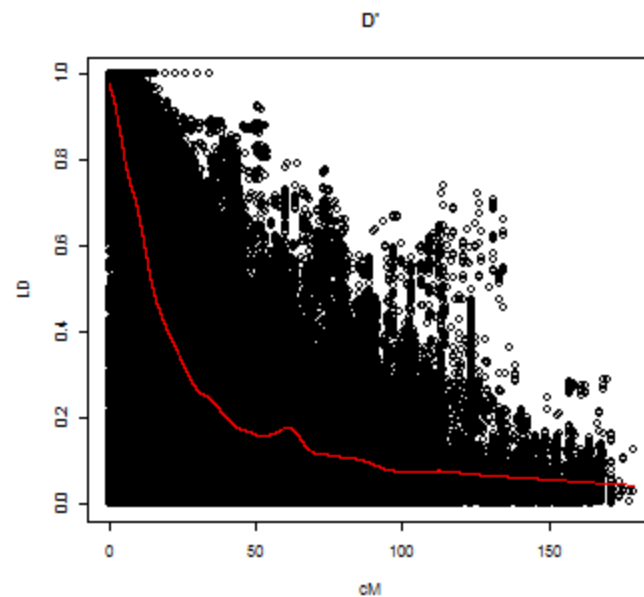

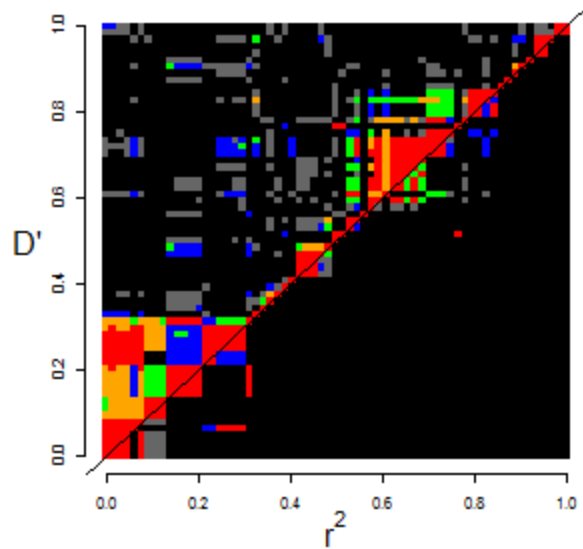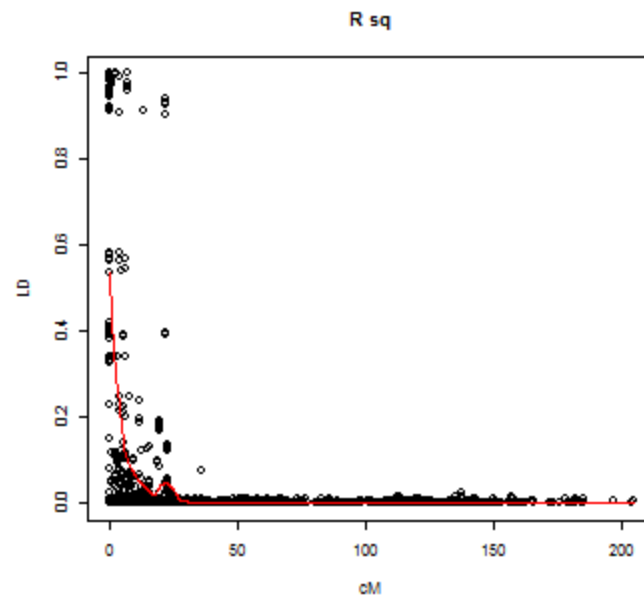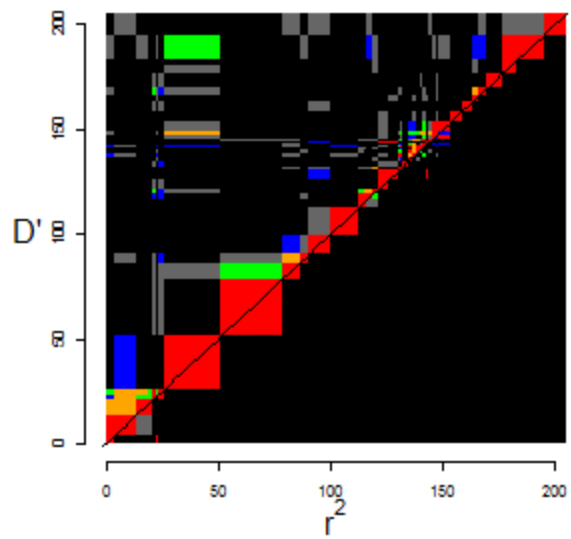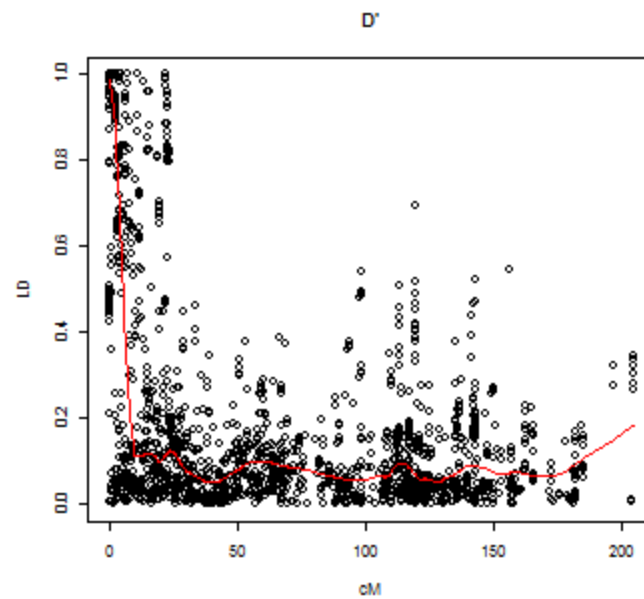

Supplement: supp_4.9.1603_FigureS1.pdf [file supp_4.9.1603_FigureS1.pdf]
