# Supplementary material for: An Eight-Parent Multiparent Advanced Generation Inter-Cross Population for Winter-Sown Wheat: Creation, Properties, and Validation
Source: PubMed Central journal article supplement (PMC4169152; doi:10.1534/g3.114.012963), 2014-09-01
Supplement: supp_4.9.1603_012963SI.pdf [file supp_4.9.1603_012963SI.pdf]

**An eight-parent Multiparent Advanced Generation Inter-Cross population for winter-sown wheat: creation, properties and validation.**

Ian J. Mackay<sup>\*</sup>, P. Bansept-Basler<sup>\*1</sup>, T. Barber<sup>\*</sup>, A.R. Bentley<sup>\*</sup>, J. Cockram<sup>\*</sup>, N. Gosman<sup>\*2</sup>, A.J. Greenland<sup>\*</sup>, R. Horsnell<sup>\*</sup>, R. Howells<sup>\*</sup>, D. O'Sullivan<sup>\*3</sup>, G.A. Rose<sup>\*</sup>, P. Howell<sup>\*</sup>

<sup>\*</sup>The John Bingham Laboratory, National Institute of Agricultural Botany (NIAB), Cambridge, CB3 0LE, UK  
Present address:

<sup>1</sup>Syngenta, Ferme de Moyencourt, 78910 Orgerus, France

<sup>2</sup>Bayer Crop Science NV, Ghent, Belgium

<sup>3</sup>University of Reading, Berkshire, RG6 6AR, UK

Corresponding author:

Ian Mackay

NIAB

Huntingdon Road

Cambridge

CB3 0LE

UK

+44 780 3283741

ian.mackay@niab.com

**DOI: 10.1534/g3.114.012963**

**Figure S1** MAGIC progeny LD heatmaps and LD decay plots for the 21 wheat chromosomes based on 13074 mapped and segregating SNPs. For each chromosome: Top left: heatmap of LD among ordered markers.  $D'$  above diagonal,  $r^2$  below. Bottom left: heatmap scaled by genetic map. Top right LD decay ( $r^2$ ) plotted against genetic distance between marker pairs. Bottom right: LD decay ( $D'$ ) plotted against genetic distance between marker pairs.

Available for download as a PDF file at <http://www.g3journal.org/lookup/suppl/doi:10.1534/g3.114.012963/-/DC1>

**Table S1** Wheat varieties in the AM panel used to validate the KASP

| Variety     | BobWhite_C8266_227_TG_5AL | Awn presence/absence |
|-------------|---------------------------|----------------------|
| ACCOR       | G:G                       | 1                    |
| ALTIGO      | G:G                       | 1                    |
| AMAROK      | G:G                       | 1                    |
| ARPEGE      | G:G                       | 1                    |
| BASTIDE     | G:G                       | 1                    |
| CALISTO     | G:G                       | 1                    |
| CAPNOR      | G:G                       | 1                    |
| DI_9714     | G:G                       | 1                    |
| EUCLIDE     | G:G                       | 1                    |
| EXOTIC      | G:G                       | 1                    |
| HURLEY      | G:G                       | 1                    |
| IENA        | G:G                       | 1                    |
| INOUI       | G:G                       | 1                    |
| ISIDOR      | G:G                       | 1                    |
| NIRVANA     | G:G                       | 1                    |
| PERNEL      | G:G                       | 1                    |
| PLETHORE    | G:G                       | 1                    |
| RODRIGO     | G:G                       | 1                    |
| RYTMIC      | G:G                       | 1                    |
| SOISSONS    | G:G                       | 1                    |
| TILBURI     | G:G                       | 1                    |
| AARDVARK    | T:T                       | 0                    |
| ABELE       | T:T                       | 0                    |
| ABO         | T:T                       | 0                    |
| ACCESS      | T:T                       | 0                    |
| ACIENDA     | T:T                       | 0                    |
| ACIENTO     | T:T                       | 0                    |
| ADEQUAT     | T:T                       | 0                    |
| ADMIRAL     | T:T                       | 0                    |
| AGAMI       | T:T                       | 0                    |
| AKTEUR      | T:T                       | 0                    |
| ALBERIC     | T:T                       | 0                    |
| ALCAZAR     | T:T                       | 0                    |
| ALCEDO      | T:T                       | 0                    |
| ALCHEMY     | T:T                       | 0                    |
| ALDRIC      | T:T                       | 0                    |
| ALI         | T:T                       | 0                    |
| ALICANTE    | T:T                       | 0                    |
| ALIDOS      | T:T                       | 0                    |
| ALIGRE      | T:T                       | 0                    |
| ALLANT      | T:T                       | 0                    |
| ALLEGRO     | T:T                       | 0                    |
| ALTO        | T:T                       | 0                    |
| ALTOS       | T:T                       | 0                    |
| ALTRIA      | T:T                       | 0                    |
| AMBITION    | T:T                       | 0                    |
| AMI         | T:T                       | 0                    |
| ANDAIN      | T:T                       | 0                    |
| ANDALOU     | T:T                       | 0                    |
| ANVIL       | T:T                       | 0                    |
| APACHE      | T:T                       | 0                    |
| APOLLO      | T:T                       | 0                    |
| APOSTLE     | T:T                       | 0                    |
| ARACK       | T:T                       | 0                    |
| ARBON       | T:T                       | 0                    |
| ARLEQUIN    | T:T                       | 0                    |
| ARMENTIERES | T:T                       | 0                    |
| ARMINDA     | T:T                       | 0                    |
| ARON        | T:T                       | 0                    |
| ASKETIS     | T:T                       | 0                    |

|            |     |   |
|------------|-----|---|
| ASTRON     | T:T | 0 |
| ATALANTE   | T:T | 0 |
| ATLANTIS   | T:T | 0 |
| ATTLASS    | T:T | 0 |
| AUBUSSON   | T:T | 0 |
| AVALON     | T:T | 0 |
| AVANTAGE   | T:T | 0 |
| AZIMUT     | T:T | 0 |
| AZTEC      | T:T | 0 |
| BALANCE    | T:T | 0 |
| BALTIMOR   | T:T | 0 |
| BARON      | T:T | 0 |
| BAROUDEUR  | T:T | 0 |
| BATIS      | T:T | 0 |
| BEAUCHAMP  | T:T | 0 |
| BEAUFORT   | T:T | 0 |
| BEAVER     | T:T | 0 |
| BERMUDE    | T:T | 0 |
| BISCAY     | T:T | 0 |
| BOBINO     | T:T | 0 |
| BOOMER     | T:T | 0 |
| BOUNTY     | T:T | 0 |
| BOUQUET    | T:T | 0 |
| BRANDO     | T:T | 0 |
| BRENNUS    | T:T | 0 |
| BRIGADIER  | T:T | 0 |
| BRIGAND    | T:T | 0 |
| BRILLIANT  | T:T | 0 |
| BROCK      | T:T | 0 |
| BUCHAN     | T:T | 0 |
| BURMA      | T:T | 0 |
| BUSTER     | T:T | 0 |
| BUTEO      | T:T | 0 |
| CADENZA    | T:T | 0 |
| CALIF      | T:T | 0 |
| CAMPARI    | T:T | 0 |
| CAMPERO    | T:T | 0 |
| CAPHORN    | T:T | 0 |
| CAPITOLE   | T:T | 0 |
| CAPTA      | T:T | 0 |
| CARDOS     | T:T | 0 |
| CARENIVS   | T:T | 0 |
| CARIBO     | T:T | 0 |
| CENTRUM    | T:T | 0 |
| CEZANNE    | T:T | 0 |
| CHAMPION   | T:T | 0 |
| CHANCELIER | T:T | 0 |
| CHARGER    | T:T | 0 |
| CHATSWORTH | T:T | 0 |
| CHIANTI    | T:T | 0 |
| CLAIRE     | T:T | 0 |
| CLICK      | T:T | 0 |
| COLBERT    | T:T | 0 |
| COMPAL     | T:T | 0 |
| COMPLIMENT | T:T | 0 |
| CONSORT    | T:T | 0 |
| CONTRA     | T:T | 0 |
| COPAIN     | T:T | 0 |
| CORDIALE   | T:T | 0 |
| CORSAIRE   | T:T | 0 |
| CORVUS     | T:T | 0 |
| CRAKLIN    | T:T | 0 |
| CRISTO     | T:T | 0 |

|           |     |   |
|-----------|-----|---|
| CRITERIUM | T:T | 0 |
| CUBUS     | T:T | 0 |
| DAVIDOC   | T:T | 0 |
| DEBEN     | T:T | 0 |
| DEFENDER  | T:T | 0 |
| DEKAN     | T:T | 0 |
| DESTINO   | T:T | 0 |
| DINOSOR   | T:T | 0 |
| DUCAT     | T:T | 0 |
| DUKE      | T:T | 0 |
| EINSTEIN  | T:T | 0 |
| EKLA      | T:T | 0 |
| ELEGANT   | T:T | 0 |
| ELOI      | T:T | 0 |
| ENORM     | T:T | 0 |
| EQUINOX   | T:T | 0 |
| ESTICA    | T:T | 0 |
| EUREKA    | T:T | 0 |
| EXALTO    | T:T | 0 |
| EXCEPT    | T:T | 0 |
| FESTIN    | T:T | 0 |
| FEUVERT   | T:T | 0 |
| FLAIR     | T:T | 0 |
| FLAME     | T:T | 0 |
| FLANDERS  | T:T | 0 |
| FLORENZO  | T:T | 0 |
| FLORETT   | T:T | 0 |
| FOLIO     | T:T | 0 |
| FORBAN    | T:T | 0 |
| FOURMI    | T:T | 0 |
| FOURNIL   | T:T | 0 |
| FRANDOC   | T:T | 0 |
| FREGATE   | T:T | 0 |
| FROIDURE  | T:T | 0 |
| FRUMENT   | T:T | 0 |
| GALA      | T:T | 0 |
| GALAHAD   | T:T | 0 |
| GALAXIE   | T:T | 0 |
| GAMIN     | T:T | 0 |
| GARANT    | T:T | 0 |
| GATSBY    | T:T | 0 |
| GAUGAIN   | T:T | 0 |
| GECKO     | T:T | 0 |
| GENIAL    | T:T | 0 |
| GLANOR    | T:T | 0 |
| GLASGOW   | T:T | 0 |
| GLOCKNER  | T:T | 0 |
| GOELENT   | T:T | 0 |
| GRANADA   | T:T | 0 |
| GRANTA    | T:T | 0 |
| GREIF     | T:T | 0 |
| GRISBY    | T:T | 0 |
| GULLIVER  | T:T | 0 |
| HAMAC     | T:T | 0 |
| HATTRICK  | T:T | 0 |
| HAVEN     | T:T | 0 |
| HEREWARD  | T:T | 0 |
| HERMANN   | T:T | 0 |
| HEROLDO   | T:T | 0 |
| HOBBIT    | T:T | 0 |
| HORNET    | T:T | 0 |
| HUSTLER   | T:T | 0 |
| HYPERION  | T:T | 0 |

|              |     |   |
|--------------|-----|---|
| IBIS         | T:T | 0 |
| IGOR         | T:T | 0 |
| IMPALA       | T:T | 0 |
| INCISIF      | T:T | 0 |
| IRIDIUM      | T:T | 0 |
| ISTABRAQ     | T:T | 0 |
| JUNIOR       | T:T | 0 |
| KADOR        | T:T | 0 |
| KALTOP       | T:T | 0 |
| LAHERTIS     | T:T | 0 |
| LANCELOT     | T:T | 0 |
| LAREDO       | T:T | 0 |
| LATER        | T:T | 0 |
| LEIFFER      | T:T | 0 |
| LIMES        | T:T | 0 |
| LOUVRE       | T:T | 0 |
| LUTIN        | T:T | 0 |
| LYNX         | T:T | 0 |
| MAGISTER     | T:T | 0 |
| MAGNUS       | T:T | 0 |
| MALACCA      | T:T | 0 |
| MANDUB       | T:T | 0 |
| MANHATTAN    | T:T | 0 |
| MAVERICK     | T:T | 0 |
| MAXYL        | T:T | 0 |
| MELKIOR      | T:T | 0 |
| MENDEL       | T:T | 0 |
| MERCIA       | T:T | 0 |
| MERKUR       | T:T | 0 |
| MESSAGE      | T:T | 0 |
| METEOR       | T:T | 0 |
| MILVUS       | T:T | 0 |
| MIRONOVSKAJA | T:T | 0 |
| MITCHEL      | T:T | 0 |
| MOISSON      | T:T | 0 |
| MURIOT       | T:T | 0 |
| MYTHOS       | T:T | 0 |
| NICAM        | T:T | 0 |
| NOBLET       | T:T | 0 |
| NORMAN       | T:T | 0 |
| NOROIT       | T:T | 0 |
| NUAGE        | T:T | 0 |
| OAKLEY       | T:T | 0 |
| OCCITAN      | T:T | 0 |
| OCTET        | T:T | 0 |
| OKAPI        | T:T | 0 |
| OPEN         | T:T | 0 |
| OPTIDOR      | T:T | 0 |
| ORATORIO     | T:T | 0 |
| ORDEAL       | T:T | 0 |
| OREPI        | T:T | 0 |
| ORESTIS      | T:T | 0 |
| ORMIL        | T:T | 0 |
| ORTOP        | T:T | 0 |
| ORVANTIS     | T:T | 0 |
| OURAGAN      | T:T | 0 |
| PACTOLE      | T:T | 0 |
| PAINDOR      | T:T | 0 |
| PAJERO       | T:T | 0 |
| PARADIS      | T:T | 0 |
| PAROLI       | T:T | 0 |
| PASTICHE     | T:T | 0 |
| PAUILLAC     | T:T | 0 |

|            |     |   |
|------------|-----|---|
| PEGASOS    | T:T | 0 |
| PEPITAL    | T:T | 0 |
| PERICLES   | T:T | 0 |
| PETRUS     | T:T | 0 |
| PR-22-R-28 | T:T | 0 |
| PROTINAL   | T:T | 0 |
| PULSAR     | T:T | 0 |
| PYTAGOR    | T:T | 0 |
| QUATUOR    | T:T | 0 |
| QUEBON     | T:T | 0 |
| RAGLAN     | T:T | 0 |
| RALEIGH    | T:T | 0 |
| RAPOR      | T:T | 0 |
| REAPER     | T:T | 0 |
| RECORD     | T:T | 0 |
| REMOIS     | T:T | 0 |
| RESO       | T:T | 0 |
| RIALTO     | T:T | 0 |
| RIBAND     | T:T | 0 |
| RITMO      | T:T | 0 |
| ROBIGUS    | T:T | 0 |
| ROMANUS    | T:T | 0 |
| RUDI       | T:T | 0 |
| RUMBA      | T:T | 0 |
| RUSTIC     | T:T | 0 |
| SAHARA     | T:T | 0 |
| SAVANNAH   | T:T | 0 |
| SCHAMANE   | T:T | 0 |
| SCORE      | T:T | 0 |
| SENATOR    | T:T | 0 |
| SEYRAC     | T:T | 0 |
| SHAMROCK   | T:T | 0 |
| SHANGO     | T:T | 0 |
| SKAGEN     | T:T | 0 |
| SKALMEJE   | T:T | 0 |
| SOBI       | T:T | 0 |
| SOCRATES   | T:T | 0 |
| SOGOOD     | T:T | 0 |
| SOKRATES   | T:T | 0 |
| SOLITER    | T:T | 0 |
| SOLSTICE   | T:T | 0 |
| SPARK      | T:T | 0 |
| SPONSOR    | T:T | 0 |
| STEADFAST  | T:T | 0 |
| STRIKER    | T:T | 0 |
| SWINDY     | T:T | 0 |
| TALENT     | T:T | 0 |
| TALON      | T:T | 0 |
| TAMBOR     | T:T | 0 |
| TANKER     | T:T | 0 |
| TAPIDOR    | T:T | 0 |
| TARAS      | T:T | 0 |
| TARSO      | T:T | 0 |
| TERRIER    | T:T | 0 |
| TEXEL      | T:T | 0 |
| THESEE     | T:T | 0 |
| TIGER      | T:T | 0 |
| TIMBER     | T:T | 0 |
| TOISONDOR  | T:T | 0 |
| TOP        | T:T | 0 |
| TORAS      | T:T | 0 |
| TOREADOR   | T:T | 0 |
| TORFRIDA   | T:T | 0 |

|            |     |   |
|------------|-----|---|
| TORONTO    | T:T | 0 |
| TRANSIT    | T:T | 0 |
| TREMIE     | T:T | 0 |
| TRIO       | T:T | 0 |
| TUAREG     | T:T | 0 |
| TUKAN      | T:T | 0 |
| TULSA      | T:T | 0 |
| TURKIS     | T:T | 0 |
| URBAN      | T:T | 0 |
| VALMY      | T:T | 0 |
| VALORIS    | T:T | 0 |
| VERCORS    | T:T | 0 |
| VIRTUE     | T:T | 0 |
| VIVANT     | T:T | 0 |
| WASP       | T:T | 0 |
| WELFORD    | T:T | 0 |
| WELLINGTON | T:T | 0 |
| WESTON     | T:T | 0 |
| WINNETOU   | T:T | 0 |
| XI19       | T:T | 0 |
| ZENTOS     | T:T | 0 |
| ZOBEL      | T:T | 0 |
| C-8-14-2   | T:T | 1 |
| PICADOR    | T:T | 1 |
| CHATELET   | G:G | 0 |

---



**Table S2 KASP primers for marker BobWhite\_c8266\_227\_TG\_5AL.** Note, the KASP design assays nucleotides on the opposing strand to the equivalent assay on the Illumina iSelect 90,000 SNP array

| <b>KASP Primer</b> | <b>Nucleotide assayed</b> | <b>Predicted phenotype</b> | <b>Primer sequence</b> |
|--------------------|---------------------------|----------------------------|------------------------|
| Allele X           | T                         | awnless                    | CGTCCATGGAGTCGTTCTCAAT |
| Allele Y           | G                         | awned                      | GTCCATGGAGTCGTTCTCAAG  |
| Common             |                           |                            | GTGGTACACGTCCGGAAGAAT  |
