# Supplementary material for: An Eight-Parent Multiparent Advanced Generation Inter-Cross Population for Winter-Sown Wheat: Creation, Properties, and Validation
Source: PubMed Central journal article supplement (PMC4169152; doi:10.1534/g3.114.012963), 2014-09-01
Supplement: supp_4.9.1603_TableS2.pdf [file supp_4.9.1603_TableS2.pdf]

**Table S2 KASP primers for marker BobWhite\_c8266\_227\_TG\_5AL.** Note, the KASP design assays nucleotides on the opposing strand to the equivalent assay on the Illumina iSelect 90,000 SNP array

| <b>KASP Primer</b> | <b>Nucleotide assayed</b> | <b>Predicted phenotype</b> | <b>Primer sequence</b> |
|--------------------|---------------------------|----------------------------|------------------------|
| Allele X           | T                         | awnless                    | CGTCCATGGAGTCGTTCTCAAT |
| Allele Y           | G                         | awned                      | GTCCATGGAGTCGTTCTCAAG  |
| Common             |                           |                            | GTGGTACACGTCCGGAAGAAT  |
